# Supplementary material for: Genetic and mechanistic overlap between Alzheimer’s disease and myasthenia gravis: insights into neuro-immune crosstalk
Source: Research Square preprint supplement (doi:10.21203/rs.3.rs-8080408/v1), 2025-11-12
Supplement: Supplementary file 1 [file 09cbb484c78836f61f89e483.docx]

**STROBE-MR checklist of recommended items to address in reports of Mendelian randomization studies**1,2

| **Item No.** | **Section** | **Checklist item** | **Note** | **Relevant text from manuscript** | **Page No.** |
| --- | --- | --- | --- | --- | --- |
| 1 | **TITLE and ABSTRACT** | Indicate Mendelian randomization (MR) as the study’s design in the title and/or the abstract if that is a main purpose of the study | The main purpose of our study is not Mendelian randomisation (MR). We only used MR as part of the methods. Hence, MR was not reflected in the title.  However, we have indicated MR in the Abstract as appropriate | **Title:**  Genetic and mechanistic overlap between Alzheimer’s disease and myasthenia gravis: insights into neuro-immune crosstalk  **Abstract:**  ‘… Mendelian randomisation suggests that genetic liability to MG modestly increases AD risk (not vice versa)…’ | 2 |
|  | **INTRODUCTION** |  |  |  |  |
| 2 | **Background** | Explain the scientific background and rationale for the reported study. What is the exposure? Is a potential causal relationship between exposure and outcome plausible? Justify why MR is a helpful method to address the study question | **Scientific background and rationale:** Alzheimer’s disease (AD) and myasthenia gravis (MG) are distinct neurological and autoimmune disorders, respectively, yet both involve cholinergic dysfunction and immune dysregulation. AD is characterised by degeneration of cholinergic neurons, neuroinflammation, and progressive cognitive decline, while MG arises from autoantibody-mediated disruption of acetylcholine receptors at the neuromuscular junction. Given that nicotinic receptors are also expressed in the brain, MG-related autoimmunity may influence central cholinergic tone. Observational studies have suggested an association between MG and AD, but results remain inconsistent due to confounding and reverse causation.  **Exposure and plausibility of causal relationship:** We examined bidirectional relationships between genetic liability to MG and AD. A causal association is biologically plausible due to shared cholinergic, immune, and inflammatory pathways contributing to both disorders.  **Justification for MR:** MR was employed bidirectionally to test whether genetic liability to one disorder causally influences the other. This approach leverages genetic variants as unconfounded proxies for exposures, reducing bias from confounding and reverse causation inherent to observational studies, and providing robust evidence for potential causal pathways. | ‘However, evidence for a potential link between AD and MG remains limited and inconclusive, highlighting an important knowledge gap.’  ‘In practice, cognitive deficits in MG may arise from multiple factors, such as chronic illness, steroid therapy, and depression, which may confound a possible MG–AD link.’  ‘Notably, Mendelian randomisation (MR) analyses of autoimmune liability (MG not included) and AD risk have generally found no strong causal effect, with only multiple sclerosis showing a possible positive association. Thus, existing evidence to date is inconclusive on the potential relationship of AD with MG.’  ‘Given these uncertainties, integrative genomic analyses offer a powerful framework for exploring causal relationships and shared molecular mechanisms across complex disorders… Unlike traditional observational studies, this approach is less susceptible to confounding influences, reverse causation, and measurement bias.’ | 3 – 4 |
| 3 | **Objectives** | State specific objectives clearly, including pre-specified causal hypotheses (if any). State that MR is a method that, under specific assumptions, intends to estimate causal effects | We stated the objective clearly for our study and indicated MR where appropriate.  Also, we indicated that MR, as a part of a suite of integrative genomic approaches, was used to estimate causal effects under specific assumptions (made clearer under MR analysis sub-section) | 1. ‘In this study, we adopt a systems genomics approach, integrating cross-trait correlation assessment (genome-wide and local), MR, GWAS meta-analysis, gene-level association testing, colocalisation, and expression-informed causal inference, to investigate the extent of causal, shared genetic and transcriptomic architecture between AD and MG.’ 2. ‘Fourth, we evaluated potential causal relationships between AD and MG using bidirectional MR analysis 3-6. This analysis included the implementation of several MR models to strengthen evidence, comprehensive sensitivity analyses to test the robustness of causal inferences, alongside assessments of horizontal pleiotropy and heterogeneity to ensure valid assumptions about the instrumental variables (IVs).’ | 4 |
|  | **METHODS** |  |  |  |  |
| 4 | **Study design and data sources** | Present key elements of the study design early in the article. Consider including a table listing sources of data for all phases of the study. For each data source contributing to the analysis, describe the following: | We present key elements of the study design clearly in the article. In addition to the general study framework, we used a Figure to present the study design for MR (Figure 3). Also, we present a Table (Supplementary Table 1, due to the details provided) indicating sources of data for all phases of our study. | Figures 1 and 3 provide a summary of the study design. Supplementary Table 1 provides additional information and links to the GWAS data sources or associated publications. | Figures 1 and 3, and Supplementary Tables |
|  | a) | Setting: Describe the study design and the underlying population, if possible. Describe the setting, locations, and relevant dates, including periods of recruitment, exposure, follow-up, and data collection, when available. | In this study, we describe the data in the section Data Source sub-section. We used large-scale GWAS summary statistics from publicly accessible repositories and international research consortia. Additionally, we have provided relevant information about the summary data used, including the sources of the data, the ancestry of the populations (which is important for MR analysis), sample sizes, and references to the original publications (In-text and Supplementary Table 1). | See detailed description of our data in the Data Source section (lines 884 – 924) | 31 and 32 |
|  | b) | Participants: Give the eligibility criteria, and the sources and methods of selection of participants. Report the sample size, and whether any power or sample size calculations were carried out prior to the main analysis | We provide appropriate information on our study participants. We used data available for MG and AD in the current study with adequate sample sizes. We provide information about the sample sizes and provide appropriate references to the original publications. | See detailed description of our data in the Data Source section (lines 884 – 924) | 31 and 32 |
|  | c) | Describe measurement, quality control and selection of genetic variants | To ensure high-quality control and robustness in our study, we selected instrumental variables (IVs) at the genome-wide significance level (P < 5 × 10⁻⁸) from the relevant GWAS summary data, ensuring that the IVs were strongly associated with the exposure variables (F-statistic greater than 10). This step minimises the risk of weak instrument bias and satisfies the first MR assumption. Due to the limited availability of genome-wide significant IVs for MG, we also relaxed the threshold to a genome-wide suggestive level (P < 1×10⁻⁶), acknowledging the potential for bias when using fewer IVs (< 10). Further, we rigorously evaluated our IVs, conducting linkage disequilibrium clumping at a stringent threshold (r² < 0.001) to enhance instrument independence. We also ensured that our IVs were not associated with the outcome variables (P < 0.05), thus fulfilling the third MR assumption. Additionally, we performed further sensitivity analyses to confirm the robustness of our IVs and mitigate potential confounding. | Measurement and Selection of Genetic Variants  ‘We identified IVs from relevant GWAS summary data, selecting those that reached genome-wide significance (p < 5 × 10⁻⁸) to ensure a strong association with exposure variables and an F-statistic above 10. This approach minimised weak instrument bias and satisfied the first MR assumption.’  “IVs were selected based on P < 5×10⁻⁸ and suggestive thresholds (P < 1×10⁻⁶) to improve instrument strength and coverage.’  Quality Control and Filtering  ‘We rigorously assessed IVs and applied stringent linkage disequilibrium clumping (r² < 0.001 and 10,000 kb) to maintain instrument independence.’  ‘To further improve data quality, we excluded genetic variants with intermediate allele frequencies to prevent strand alignment issues, removed variants absent in the reference dataset, and harmonised exposure and outcome data by aligning alleles and maintaining consistency in effect directions.’  ‘We confirmed that there was no significant overlap of samples between AD and MG datasets, potentially ruling out likely biases arising from shared individuals in both GWAS cohorts.’  Additional Quality Control in Colocalisation  ‘The datasets were merged based on rsID and allele information, aligning effect and non-effect alleles across both traits. Standardised Z-scores and variances for each SNP were then used as input for the GWAS-PW model. The analysis focused on predefined independent genetic regions based on LD patterns from the 1000 Genomes Project European reference panel. This approach ensured that our findings were not confounded by correlated SNPs within LD blocks.’ | 35 and 36 |
|  | d) | For each exposure, outcome, and other relevant variables, describe methods of assessment and diagnostic criteria for diseases | In this study we assess AD and MG traits. We summarise as appropriate, methods of assessment or diagnostic criteria of AD and MG in our study. | ‘We identified IVs from relevant GWAS summary data… Relevant GWAS summary statistics for AD and MG were derived from large-scale genome-wide association studies that used clinically diagnosed cases and well-defined controls.’  ‘For AD, cases were defined according to standard clinical diagnostic criteria for Alzheimer’s disease or proxy phenotypes validated against clinical diagnoses, as implemented in the source GWAS. For MG, case definitions were based on confirmed clinical diagnosis supported by serological and electrophysiological evidence as applied in the contributing GWAS cohorts.’  ‘Both datasets underwent extensive quality control in their original studies, including imputation to reference panels, exclusion of individuals with ambiguous sex, relatedness, or non-European ancestry, and filtering of SNPs with low imputation quality or minor allele frequency.’  ‘To ensure comparability, exposure and outcome data were harmonised by aligning alleles and maintaining consistency in effect directions. Standardised Z-scores and variances for each SNP were used as input for subsequent analyses.’ | 5 |
|  | e) | Provide details of ethics committee approval and participant informed consent, if relevant | We used summary statistics from publicly accessible repositories and international research consortia. Each contributing study obtained ethical approval from its respective institutional review board, eliminating the need for additional ethical clearance for this study. | ‘All included participants were of European ancestry, and each contributing study obtained ethical approval from its respective institutional review board.’  ‘… no additional ethics approval or participant consent was required. The analyses complied with all relevant data-sharing and ethical guidelines for secondary use of genomic data.’ | 31 and 40 |
| 5 | **Assumptions** | Explicitly state the three core IV assumptions for the main analysis (relevance, independence and exclusion restriction) as well assumptions for any additional or sensitivity analysis | We stated the three core IV assumptions and where relevant for the specific additional or sensitivity analyses. | **Figure 3**  ‘… The figure emphasises three main MR assumptions: (1) the genetic variants (SNPs) used as instrumental variables must be strongly associated with the exposure, (2) these SNPs should not be linked to confounding factors, and (3) they must affect the outcome solely through the exposure…’ | 13 |
| 6 | **Statistical methods: main analysis** | Describe statistical methods and statistics used | We describe the statistical methods and statistics used | See details below |  |
|  | a) | Describe how quantitative variables were handled in the analyses (i.e., scale, units, model) | We do not have quantitative variables. We have described how binary traits were handled. | ‘All SNP effect estimates were modelled on the log-odds scale for binary traits (AD and MG), with harmonised beta coefficients and standard errors used to derive Wald ratios and corresponding variance-weighted averages in MR analyses.’ | 35 |
|  | b) | Describe how genetic variants were handled in the analyses and, if applicable, how their weights were selected | Genetic variants were handled through a series of stringent quality control and harmonisation steps. Independent SNPs associated with the exposure at genome-wide significance (p < 5 × 10⁻⁸) were selected as instrumental variables, with linkage disequilibrium clumping (r² < 0.001, 10,000 kb) applied to ensure independence. Variants with intermediate allele frequencies, ambiguous strands, or missing data in the outcome GWAS were excluded. Exposure and outcome datasets were harmonised by aligning effect alleles and ensuring consistent effect directions. In MR analyses, SNP weights were determined by the inverse variance of their association estimates (β/SE²), consistent with the IVW framework, while additional MR methods (weighted median, MR-Egger) applied their respective weighting schemes. | ‘We identified IVs from relevant GWAS summary data, selecting those that reached GWS (p < 5 × 10⁻⁸) to ensure a strong association with exposure variables and an F-statistic above 10. This approach minimised weak instrument bias and satisfied the first MR assumption.’  ‘We rigorously assessed IVs and applied stringent linkage disequilibrium clumping (r² < 0.001 and 10,000 kb) to maintain instrument independence.’  ‘To further improve data quality, we excluded genetic variants with intermediate allele frequencies to prevent strand alignment issues, removed variants absent in the reference dataset, and harmonised exposure and outcome data by aligning alleles and maintaining consistency in effect directions.’  ‘Additionally, we confirmed that there was no significant overlap of samples between AD and MG datasets, potentially ruling out likely biases arising from shared individuals in both GWAS cohorts.’ | 35 |
|  | c) | Describe the MR estimator (e.g. two-stage least squares, Wald ratio) and related statistics. Detail the included covariates and, in case of two-sample MR, whether the same covariate set was used for adjustment in the two samples | We used two-sample Mendelian randomisation (MR) to estimate the causal effects between Alzheimer’s disease (AD) and myasthenia gravis (MG). The primary MR estimator was the inverse-variance weighted (IVW) method under a multiplicative random-effects model, complemented by sensitivity analyses using MR-Egger, weighted median, and weighted mode approaches. For single-instrument analyses, we applied the Wald ratio. The analyses relied on GWAS summary statistics that were adjusted for key covariates, including age, sex, and ancestry principal components, in both exposure and outcome datasets, ensuring consistency across samples. | ‘In this study, we employed the inverse variance weighted (IVW) method as the primary MR approach. This technique aggregates the Wald ratios from individual genetic instruments into a single weighted average, with weights determined by the inverse variance of each ratio.  ‘To account for potential heterogeneity in causal estimates across variants, we applied the multiplicative random-effects version of the IVW model.’  ‘To supplement IVW estimates, we incorporated additional MR methods, including the weighted median approach, which provides valid estimates even if up to 50% of IVs are invalid, and MR-Egger regression, which adjusts for pleiotropy to produce unbiased estimates.’ | 35 |
|  | d) | Explain how missing data were addressed | We used the data described in the data source sub-section; missing data does not apply to our study. | NA | NA |
|  | e) | If applicable, indicate how multiple testing was addressed | We use the Bonferroni approach to account for multiple testing corrections in our study. | ‘Results with p-values below 0.05 were considered nominally significant. To account for multiple comparisons, we consider our findings significant at P < 0.025 (0.05/2, Bonferroni adjustment for assessing two traits).’ | 35 |
| 7 | **Assessment of assumptions** | Describe any methods or prior knowledge used to assess the assumptions or justify their validity | To ensure the validity of the three core MR assumptions, we employed both prior knowledge and statistical methods to assess and justify their adherence.  We selected instrumental variables (IVs) based on genome-wide significance thresholds (P < 5 × 10⁻⁸) from the relevant GWAS summary data, ensuring strong associations with the exposure (assumption 1). For cases with limited genome-wide significant SNPs, we used genome-wide suggestive thresholds (P < 1 × 10⁻⁵), acknowledging potential limitations.  To ensure independence from potential confounders (assumption 2), we applied linkage disequilibrium (LD) clumping (r² < 0.001) to select independent SNPs. Additionally, we tested for associations between the selected instruments and known confounders when data were available. We ensured that the IVs were not associated with the outcome variables contributing to ensuring that the IV-outcome relationship is through the exposure (assumption 3). | We identified IVs from relevant GWAS summary data, selecting those that reached GWS (p < 5 × 10⁻⁸) to ensure a strong association with exposure variables and an F-statistic above 10. This approach minimised weak instrument bias and satisfied the first MR assumption. The second MR assumption, that IVs are unlinked to confounders, is more challenging to validate; however, we rigorously assessed IVs and applied stringent linkage disequilibrium clumping (r² < 0.001, and 10000kb, Figure 1) to maintain instrument independence. To further improve data quality, we excluded genetic variants with intermediate allele frequencies to prevent strand alignment issues, removed variants absent in the reference dataset, and harmonised exposure and outcome data by aligning alleles and maintaining consistency in effect directions. Additional robustness checks were conducted, as outlined in the main MR and sensitivity analyses. | 35 |
| 8 | **Sensitivity analyses and additional analyses** | Describe any sensitivity analyses or additional analyses performed (e.g. comparison of effect estimates from different approaches, independent replication, bias analytic techniques, validation of instruments, simulations) | To ensure the robustness and reliability of our MR findings, we conducted several sensitivity and additional analyses aimed at addressing potential biases, validating instruments, and confirming the consistency of causal estimates. The primary analysis method was the IVW model, which assumes no horizontal pleiotropy and remains reliable as long as this assumption holds. We applied the multiplicative random-effects version of the IVW model to account for potential heterogeneity in causal estimates across variants. We used the weighted median approach to obtain valid estimates even if up to 50% of IVs are invalid, and we applied MR-Egger regression, which adjusts for pleiotropy to produce unbiased estimates. We also used the Benjamini–Hochberg FDR correction method to account for multiple comparisons.  We conducted a series of sensitivity analyses to ensure the reliability of our findings. These included Cochran’s Q statistic to detect heterogeneity among SNP-specific causal estimates. Individual MR analyses were conducted to assess the consistency of causal estimates across different IVs. Leave-one-out analyses were to assess whether any single IV disproportionately influenced the overall results, helping to identify potential outliers or pleiotropic variants.  In summary-data-based Mendelian randomisation**,** we applied the HEIDI test to distinguish between true pleiotropy and linkage | ‘To ensure the reliability of our MR analysis and align with best practices in the field, we conducted a series of sensitivity tests. These tests included Cochran’s Q statistic to evaluate heterogeneity in SNP effects.’  ‘We conducted individual MR analyses to assess the consistency of causal estimates across different IVs, and leave-one-out analyses to assess whether any single IV disproportionately influenced the overall results, helping to identify potential outliers or pleiotropic variants.’  ‘Additionally, we examined the funnel plot for symmetry to detect potential biases.’  ‘We applied the MR-Egger intercept test to evaluate deviations from the assumption of no directional pleiotropy, where a significant departure from zero would suggest a possible violation.’  ‘To further account for pleiotropy, we utilised the MR pleiotropy residual sum and outlier (MR-PRESSO) method, which identifies and removes outlier variants contributing to pleiotropic effects.’  ‘Further, we conducted bi-directional Generalised Summary-data-based Mendelian Randomisation (GSMR) analyses…GSMR extends traditional MR methods by accounting for residual LD between SNPs and by implementing the HEIDI-outlier test to detect and remove variants with pleiotropic effects, enhancing the robustness of causal inference by reducing bias from invalid instruments.’ | 35 |
| 9 | **Software and pre-registration** |  |  |  |  |
|  | a) | Name statistical software and package(s), including version and settings used | The analyses were conducted using RStudio, with the ‘TwoSampleMR’ R package (version 0.5.6) employed for the analyses. We used the Unix platform for data manipulation and management. | We utilised the R statistical packages and the Unix environment for data management and analyses, and used the 2SMR software (version 0.5.6), and MR-PRESSO for the MR analyses (implemented on the R packages [version 4.2.1]). | 35 |
|  | b) | State whether the study protocol and details were pre-registered (as well as when and where) | There is no requirement for pre-registering our study protocol. | NA | NA |
|  | **RESULTS** |  |  |  |  |
| 10 | **Descriptive data** |  |  |  |  |
|  | a) | Report the numbers of individuals at each stage of included studies and reasons for exclusion. Consider use of a flow diagram | We used the data comprising the full sample of individuals in each of the GWAS analysed in our study. | NA |  |
|  | b) | Report summary statistics for phenotypic exposure(s), outcome(s), and other relevant variables (e.g. means, SDs, proportions) | NA | NA |  |
|  | c) | If the data sources include meta-analyses of previous studies, provide the assessments of heterogeneity across these studies | For our MR analysis, we used Cochran’s Q statistic to evaluate heterogeneity in SNP effects. In this study, we detected no significant heterogeneity. | The MR-Egger intercept test for this analysis revealed no evidence of horizontal pleiotropy, as the intercept remained close to zero with no significant deviation (Supplementary Table 7). Similarly, we did not detect any significant heterogeneity (Supplementary Table 7). | 13 |
|  | d) | For two-sample MR:  i.  Provide justification of the similarity of the genetic variant-exposure associations between the exposure and outcome samples  ii.  Provide information on the number of individuals who overlap between the exposure and outcome studies | 1. In this two-sample MR study, we ensured consistency between the exposure and outcome datasets by using individuals of the same ancestry (European ancestry), excluding genetic variants with intermediate allele frequencies to prevent strand alignment issues, removing variants absent in the reference dataset, and harmonising exposure and outcome data by aligning alleles and maintaining consistency in effect directions. 2. We assessed the proportion of potential overlap of samples in our study using an unconstrained genetic covariance intercept. Based on our findings there was no evidence for significant sample overlap between AD and MG. | 1. ‘All GWAS summary statistics used in the MR analysis were previously adjusted for relevant covariates, including age, sex, and ancestry principal components, ensuring consistency across exposure and outcome datasets.’   ‘Exposure and outcome data were harmonised by aligning alleles and maintaining consistency in effect directions, reducing bias from strand mismatches or differences in reference alleles.’   1. … We initially performed analyses with an unconstrained genetic covariance intercept to assess the proportion of potential sample overlap between AD and MG. The genetic covariance intercept was not significantly different from zero, indicating no evidence of significant sample overlap... | 35  32 |
| 11 | **Main results** |  |  |  |  |
|  | a) | Report the associations between genetic variant and exposure, and between genetic variant and outcome, preferably on an interpretable scale | We report the associations between genetic variants and the exposure (AD or MG) using the beta coefficients and standard errors from the original GWAS summary statistics. For MR analyses, these effect estimates were harmonised and expressed on the log-odds scale, ensuring interpretability for binary outcomes. Outcome associations for the same variants were similarly extracted from the relevant GWAS, harmonised for allele alignment, and used to calculate Wald ratios and IVW estimates. This approach allows clear interpretation of the effect of each variant on exposure and outcome in a consistent and comparable scale. | SNP–exposure association and scale:  ‘We identified IVs from relevant GWAS summary data, selecting those that reached GWS (p < 5 × 10⁻⁸) to ensure a strong association with exposure variables and an F-statistic above 10.’  SNP–outcome association and harmonisation:  ‘To further improve data quality, we excluded genetic variants with intermediate allele frequencies to prevent strand alignment issues, removed variants absent in the reference dataset, and harmonised exposure and outcome data by aligning alleles and maintaining consistency in effect directions.’  Interpretability/scale in MR:  ‘All SNP effect estimates were modelled on the log-odds scale for binary traits (AD and MG), with harmonised beta coefficients and standard errors used to derive Wald ratios and variance-weighted averages in MR analyses.’ | 35 |
|  | b) | Report MR estimates of the relationship between exposure and outcome, and the measures of uncertainty from the MR analysis, on an interpretable scale, such as odds ratio or relative risk per SD difference | MR estimates of the causal effect of MG on AD (and vice versa) were calculated using the inverse-variance weighted (IVW) method as the primary estimator, with complementary estimates from MR-Egger and weighted median approaches. Effect sizes were expressed on the log-odds scale and transformed into odds ratios for interpretability. Standard errors and 95% confidence intervals were reported to quantify uncertainty, and a Bonferroni correction was applied to account for multiple comparisons. Wald ratios were calculated for individual SNPs where applicable, ensuring consistent scaling across instruments. | Primary MR estimate and weighting:  ‘In this study, we employed the IVW method as the primary MR approach. This technique aggregates the Wald ratios from individual genetic instruments into a single weighted average, with weights determined by the inverse variance of each ratio.’  Effect scale and uncertainty:  ‘All SNP effect estimates were modelled on the log-odds scale for binary traits (AD and MG), with harmonised beta coefficients and standard errors used to derive Wald ratios and variance-weighted averages in MR analyses.’  Multiple testing/significance:  ‘Results with p-values below 0.05 were considered nominally significant. To account for multiple comparisons, we consider our findings significant at P < 0.025 (0.05/2, Bonferroni adjustment for assessing two traits).’ | 35 |
|  | c) | If relevant, consider translating estimates of relative risk into absolute risk for a meaningful time period | Not relevant | NA |  |
|  | d) | Consider plots to visualize results (e.g. forest plot, scatterplot of associations between genetic variants and outcome versus between genetic variants and exposure) | We used the funnel plots to visually inspect the symmetry of distribution (exposure vs outcome variables), towards assessing outlier SNPs and validating the MR assumption. | … we examined the funnel plot for symmetry… | 35 |
| 12 | **Assessment of assumptions** |  |  |  |  |
|  | a) | Report the assessment of the validity of the assumptions | We carried out various tests including horizontal pleiotropy and heterogeneity assessment. Additional details are provided in Supplementary Table 7  We used other methods of MR analysis including MR-PRESSO | The MR-Egger intercept test for this analysis revealed no evidence of horizontal pleiotropy, as the intercept remained close to zero with no significant deviation (Supplementary Table 7). Similarly, we did not detect any significant heterogeneity (Supplementary Table 7). | 13 |
|  | b) | Report any additional statistics (e.g., assessments of heterogeneity across genetic variants, such as *I2*, Q statistic or E-value) | We assessed heterogeneity and unbalanced pleiotropy. The results of those are presented in Supplementary Table 7. | The MR-Egger intercept test for this analysis revealed no evidence of horizontal pleiotropy, as the intercept remained close to zero with no significant deviation (Supplementary Table 7). Similarly, we did not detect any significant heterogeneity (Supplementary Table 7). | 13 |
| 13 | **Sensitivity analyses and additional analyses** |  |  |  |  |
|  | a) | Report any sensitivity analyses to assess the robustness of the main results to violations of the assumptions | We carried out various tests including horizontal pleiotropy and heterogeneity assessment. Additional details are provided in Supplementary Table 7  We used other methods of MR analysis including MR-PRESSO | The MR-Egger intercept test for this analysis revealed no evidence of horizontal pleiotropy, as the intercept remained close to zero with no significant deviation (Supplementary Table 7). Similarly, we did not detect any significant heterogeneity (Supplementary Table 7). | 13 |
|  | b) | Report results from other sensitivity analyses or additional analyses | We conducted a range of sensitivity and additional analyses to ensure the robustness of our MR findings. These included complementary MR methods (weighted median, MR-Egger), pleiotropy-robust analyses (MR-PRESSO, HEIDI outlier test in GSMR), heterogeneity assessments (Cochran’s Q, leave-one-out analyses), and replication using an independent AD GWAS (Lambert et al). Additionally, we explored the impact of using suggestive IV thresholds (P < 1×10⁻⁶) to increase instrument strength for MG, and performed bi-directional GSMR analyses. Across these analyses, the effect of AD on MG remained null, while the effect of MG on AD was weak but statistically significant in some models, with no evidence of horizontal pleiotropy or heterogeneity, supporting the robustness of the observed associations. | Complementary MR methods and pleiotropy check:  ‘The primary model (IVW) produced an odds ratio (OR) of 0.83 … similar null results were obtained with the weighted median (OR = 0.83 …) and MR Egger (OR = 0.86 …) methods. MR-PRESSO result supported these findings.’  Replication using an independent dataset:  ‘Parallel analyses using another AD GWAS (from Lambert et al, for potential [partial] replication) yielded concordant null effects (IVW: OR = 1.02 …), suggesting no evidence that AD exerts a causal influence on MG.’  Bi-directional GSMR and pleiotropy assessment:  ‘We performed further assessment using the bi-directional GSMR approach, in which IVs were selected at both genome-wide (P < 5 × 10⁻⁸) and suggestive (P < 1 × 10⁻⁶) thresholds … with no evidence of horizontal pleiotropy (HEIDI test P = 0.98). In contrast, we found no evidence of a causal effect of AD on MG in either direction.’ | 12 – 14 |
|  | c) | Report any assessment of direction of causal relationship (e.g., bidirectional MR) | We conducted bidirectional MR analyses to assess the causal relationship in both directions between AD and MG. The effect of AD on MG was null across all MR methods, while the effect of MG on AD showed a weak but statistically significant association in some models, supporting a possible causal influence from MG to AD | We assessed the bidirectional causal relationships between AD and MG using the MR approach. … We first assessed the effect of AD on MG and found no evidence of a causal influence. Conversely, when we examined the reverse relationship—the effect of MG on AD—the IVW model revealed a weak yet statistically significant causal effect (OR = 1.013, 95% CI: 1.004–1.021, P = 2.67 × 10⁻³). | 13 |
|  | d) | When relevant, report and compare with estimates from non-MR analyses | Our study employed multiple complementary methods, including bidirectional MR, GSMR, and GWAS-PW colocalisation, to provide holistic insights into the genetic links and potential causal relationships between AD and MG. | We employ well-established and robust analytical approaches to investigate the genetic links between AD and MG (Figure 1). | 4  Figure 1 |
|  | e) | Consider additional plots to visualize results (e.g., leave-one-out analyses) | We used several plots including leave-one-out, funnel and scatter plots in our MR study. The individual plots were not included in our report, as they could become redundant due to the focus of our study not only on MR, but a more detailed assessment using other methods |  |  |
|  | **DISCUSSION** |  |  |  |  |
| 14 | **Key results** | Summarize key results with reference to study objectives | We summarise key results concerning our study objectives | Genetic correlation and overlap do not necessarily imply causation 7. Hence, we conducted bidirectional MR analyses to explore the potential causal relationship between AD and MG. Our results consistently indicate that AD does not causally influence MG, as shown across multiple methods. In contrast, we found putative evidence that genetic liability to MG may increase the risk of AD. This association was supported by multiple MR models and partly replicated with instruments selected at a suggestive level (to increase IVs). | 24 – 25 |
| 15 | **Limitations** | Discuss limitations of the study, taking into account the validity of the IV assumptions, other sources of potential bias, and imprecision. Discuss both direction and magnitude of any potential bias and any efforts to address them | We discuss the limitations of our study, specifically as relates to MR and its core assumptions. See the section for strengths and limitations for details. | Third, although multiple MR methods were employed, undetected horizontal pleiotropy or the limited number of MG instruments may influence the inferred causal effect of MG on AD. | 29 |
| 16 | **Interpretation** |  |  |  |  |
|  | a) | Meaning: Give a cautious overall interpretation of results in the context of their limitations and in comparison with other studies | We provided an overall cautious interpretation of our results, considering limitations and in comparison, with other studies. | These findings suggest a model in which autoimmune processes characteristic of MG may predispose individuals to neurodegenerative pathology in AD. The effect is modest but likely biologically meaningful, consistent with the multifactorial nature of AD, while also highlighting the need for a cautious interpretation. | 25 |
|  | b) | Mechanism: Discuss underlying biological mechanisms that could drive a potential causal relationship between the investigated exposure and the outcome, and whether the gene-environment equivalence assumption is reasonable. Use causal language carefully, clarifying that IV estimates may provide causal effects only under certain assumptions | Our findings suggest a model in which autoimmune processes underlying MG may contribute to susceptibility to neurodegenerative changes observed in AD. The observed effect is modest but biologically plausible, reflecting the complex and multifactorial nature of AD. While the results are consistent with shared immune-mediated mechanisms, causal interpretation should remain cautious given the assumptions inherent to MR and potential gene–environment interactions. | These findings suggest a model in which autoimmune processes characteristic of MG may predispose individuals to neurodegenerative pathology in AD. The effect is modest but likely biologically meaningful, consistent with the multifactorial nature of AD, while also highlighting the need for a cautious interpretation. | 25 |
|  | c) | Clinical relevance: Discuss whether the results have clinical or public policy relevance, and to what extent they inform effect sizes of possible interventions | Our findings have potential clinical relevance, suggesting that immune dysregulation characteristic of MG may modestly increase susceptibility to AD. This highlights opportunities for early identification of at-risk individuals and the potential to repurpose immunomodulatory therapies for prevention or treatment strategies. However, the effect size is small, and further research is needed to validate these associations and assess their translational potential before informing clinical or policy decisions. | These findings suggest a model in which autoimmune processes characteristic of MG may predispose individuals to neurodegenerative pathology in AD. The effect is modest but likely biologically meaningful, consistent with the multifactorial nature of AD, while also highlighting the need for a cautious interpretation. | 25 |
| 17 | **Generalizability** | Discuss the generalizability of the study results (a) to other populations, (b) across other exposure periods/timings, and (c) across other levels of exposure | Our study is based on data from the European population and may not be generalised to other ancestries. We have discussed or noted this observation in several aspects of our study including the methods and limitations sub-section. | First, both GWAS datasets were based on individuals of European ancestry, which limits the generalisability of our findings to populations with different genetic backgrounds. Nevertheless, our study provides robust within-population estimates that can inform and guide future multi-ancestry analyses. | 29 |
|  | **OTHER INFORMATION** |  |  |  |  |
| 18 | **Funding** | Describe sources of funding and the role of funders in the present study and, if applicable, sources of funding for the databases and original study or studies on which the present study is based | We have described funding sources and roles in the present study. | E.O.A. was supported by an NHMRC Investigator Fellowship (GNT2025837). The funding body had no role in the design, analysis, interpretation, or reporting of the study findings. | 46 |
| 19 | **Data and data sharing** | Provide the data used to perform all analyses or report where and how the data can be accessed, and reference these sources in the article. Provide the statistical code needed to reproduce the results in the article, or report whether the code is publicly accessible and if so, where | We provide detailed information on the data used for analysis in our study in-text with additional cohort-specific details and links to publications and/or download sources in Supplementary Table 1.  Also, we have indicated that the codes used in our work are publicly available with links to their sources | Data Availability  All data analysed in this study are fully described in the main manuscript and Supplementary Materials. GWAS summary statistics were obtained from publicly accessible repositories and international research consortia, as detailed in the data sources section. Supplementary Table 1 provides a comprehensive overview of all datasets, including accession details and direct links for data access where appropriate.  Code availability  Analyses were conducted using publicly available software. URLs for each tool, along with relevant documentation and code, where applicable, are listed below: | 40 |
| 20 | **Conflicts of Interest** | All authors should declare all potential conflicts of interest | We have provided information that we have no conflict of interest to declare. | Competing interests  All authors declare no competing interests | 47 |

This checklist is copyrighted by the Equator Network under the Creative Commons Attribution 3.0 Unported (CC BY 3.0) license.

References

1 Skrivankova, V. W. *et al.* Strengthening the reporting of observational studies in epidemiology using mendelian randomisation (STROBE-MR): explanation and elaboration. *bmj* **375** (2021).

2 Skrivankova, V. W. *et al.* Strengthening the reporting of observational studies in epidemiology using Mendelian randomization: the STROBE-MR statement. *Jama* **326**, 1614-1621 (2021).

3 Davies, N. M., Holmes, M. V. & Davey Smith, G. Reading Mendelian randomisation studies: a guide, glossary, and checklist for clinicians. *BMJ* **362**, k601 (2018). https://doi.org/10.1136/bmj.k601

4 Richmond, R. C. & Davey Smith, G. Mendelian Randomization: Concepts and Scope. *Cold Spring Harb Perspect Med* **12** (2022). https://doi.org/10.1101/cshperspect.a040501

5 Zhu, Z. *et al.* Causal associations between risk factors and common diseases inferred from GWAS summary data. *Nature Communications* **9**, 224 (2018). https://doi.org/10.1038/s41467-017-02317-2

6 Verbanck, M., Chen, C.-y., Neale, B. & Do, R. Detection of widespread horizontal pleiotropy in causal relationships inferred from Mendelian randomization between complex traits and diseases. *Nature genetics* **50**, 693-698 (2018).

7 O’Connor, L. J. & Price, A. L. Distinguishing genetic correlation from causation across 52 diseases and complex traits. *Nature Genetics* **50**, 1728-1734 (2018). https://doi.org/10.1038/s41588-018-0255-0
