# Supplementary material for: Genetic and mechanistic overlap between Alzheimer’s disease and myasthenia gravis: insights into neuro-immune crosstalk
Source: Research Square preprint supplement (doi:10.21203/rs.3.rs-8080408/v1), 2025-11-12
Supplement: Supplementary file 2 [file 6512ab09305898fab1c0832b.xlsx]

## Sheet: ST-1
		Supplementary Table 1: Description of GWAS data analysed in this study with links to the source
	S/N	Traits	Trait description	Ancestry	Cases	Control	Sample	Reference	weblink
				European
	A	Alzheimer's disease
	1	Alzheimer's disease	Summary data for GWAS of Alzheimer's diseases comprising of clinically diagnosed cases and AD-by-proxy cases		71880	383378	455258	Jansen, I. E. et al. Genome-wide meta-analysis identifies new loci and functional pathways influencing Alzheimer’s disease risk. Nature genetics 51, 404-413 (2019).	https://ctg.cncr.nl/documents/p1651/AD_sumstats_Jansenetal_2019sept.txt.gz
	2	Alzheimer's disease	Summary data for GWAS of Alzheimer's diseases comprising of clinically diagnosed cases		17008	37154	54162	Lambert, J.C., et al., Meta-analysis of 74,046 individuals identifies 11 new susceptibility loci for Alzheimer's disease. Nat Genet, 2013. 45(12): p. 1452-8.	http://ftp.ebi.ac.uk/pub/databases/gwas/summary_statistics/GCST002001-GCST003000/GCST002245/IGAP_summary_statistics.zip
	B	Myasthenia gravis (MG)
	3	MG	Summary data for GWAS of MG		5708	432028	437736	Braun, A. et al. Genome-wide meta-analysis of myasthenia gravis uncovers new loci and provides insights into polygenic prediction. Nature Communications 15, 9839 (2024). https://doi.org/10.1038/s41467-024-53595-6	https://ftp.ebi.ac.uk/pub/databases/gwas/summary_statistics/GCST90432001-GCST90433000/GCST90432156/GCST90432156.tsv
	4	Late-onset MG	Summary data for GWAS of late onset MG		2404	64103	66507	Braun, A. et al. Genome-wide meta-analysis of myasthenia gravis uncovers new loci and provides insights into polygenic prediction. Nature Communications 15, 9839 (2024). https://doi.org/10.1038/s41467-024-53595-6	https://ftp.ebi.ac.uk/pub/databases/gwas/summary_statistics/GCST90432001-GCST90433000/GCST90432158/GCST90432158.tsv
	5	Early-onset MG	Summary data for GWAS of early onset MG		1391	22407	23798	Braun, A. et al. Genome-wide meta-analysis of myasthenia gravis uncovers new loci and provides insights into polygenic prediction. Nature Communications 15, 9839 (2024). https://doi.org/10.1038/s41467-024-53595-6	https://ftp.ebi.ac.uk/pub/databases/gwas/summary_statistics/GCST90432001-GCST90433000/GCST90432157/GCST90432157.tsv

## Sheet: ST-2
		Supplementary Table 2: Genome-wide genetic correlation between AD and MG
		Trait 1	Trait 2	rg	se	P
		AD-1 1	MG	0.11	0.047	2.07 × 10 -2
		AD-1 1 (Excluding APOE region)		0.11	0.051	3.62 × 10 -2
		AD-1 1 (Excluding APOE and MHC regions)		0.12	0.052	2.18 × 10 -2
		AD-1 1	Early-onset MG	0.1	0.09	2.89 × 10 -1
		AD-1 1 (Excluding APOE region)		0.09	0.1	3.69 × 10 -1
		AD-1 1 (Excluding APOE and MHC regions)		0.09	0.1	3.69 × 10 -1
		AD-1 1	Late-onset MG	0	0.08	9.82 × 10 -1
		AD-1 1 (Excluding APOE region)		0	0.09	9.61 × 10 -1
		AD-1 1 (Excluding APOE and MHC regions)		0	0.09	9.61 × 10 -1
		Replication for AD
		AD-2 3	MG	0.09	0.045	3.85 × 10 -2
		AD-2 3 (Excluding APOE region)		0.1	0.047	4.01 × 10 -2
		AD-2 3 (Excluding APOE and MHC regions)		0.1	0.047	4.01 × 10 -2
		AD-2 3	Early-onset MG	0.02	0.1	8.06 × 10 -1
		AD-2 3 (Excluding APOE region)		0.02	0.11	8.52 × 10 -1
		AD-2 3 (Excluding APOE and MHC regions)		0.02	0.11	8.52 × 10 -1
		AD-2 3	Late-onset MG	0.05	0.09	5.87 × 10 -1
		AD-2 3 (Excluding APOE region)		0.04	0.09	6.37 × 10 -1
		AD-2 3 (Excluding APOE and MHC regions)		0.04	0.09	6.37 × 10 -1
		Correlation across MG subsets
		Early-onset MG	MG	0.61	0.11	9.83 × 10 -9*
		Late-onset MG		0.83	0.18	2.20 × 10 -6*
		Early-onset MG	Late-onset MG	0.36	0.16	2.40 × 10 -2
		AD: Alzheimer's disease, AD-1: Alzheimer’s disease GWAS from Jansen et al1, AD-2: Alzheimer’s disease GWAS from Lambert et al3, MG: Myasthenia gravis, rg: genetic correlation, se: standard error, P: P-value, MHC: Major Histocompatibility Complex. We constrained the genetic covariance (gencov) intercept when there was no significant sample overlap, as indicated by a gencov intercept that was not s…

## Sheet: ST-3
	Supplementary Table 3: LDSC-SEG tissue enrichment for AD and MG
	MG
	Name	Coefficient	Coefficient_std_error	Coefficient_P_value
	Whole_Blood	1.94345e-09	5.78824e-10	0.000393133
	Cells_EBV-transformed_lymphocytes	1.29197e-09	5.73127e-10	0.0120903
	A15.382.520.604.800.Palatine.Tonsil	1.45465e-09	6.4654e-10	0.0122278
	Lung	1.51767e-09	6.87566e-10	0.0136463
	A11.118.637.555.567.562.440.Precursor.Cells..B.Lymphoid	1.32635e-09	6.09823e-10	0.0148161
	A15.382.490.555.567.Lymphocytes	1.41144e-09	6.63154e-10	0.0166529
	Spleen	1.33095e-09	6.37561e-10	0.0184184
	A11.118.637.555.567.569.200.700.T.Lymphocytes..Regulatory	1.12366e-09	6.24376e-10	0.0359575
	A15.145.229.Blood.Cells	1.14452e-09	6.38635e-10	0.0365562
	A15.145.229.637.555.567.569.200.CD4.Positive.T.Lymphocytes	1.12254e-09	6.29757e-10	0.0373336
	A11.118.637.555.567.569.T.Lymphocytes	1.17269e-09	6.71151e-10	0.0402937
	Adipose_Subcutaneous	7.54431e-10	4.52622e-10	0.0477771
	AD
	A15.382.Immune.System	2.02449e-09	7.02191e-10	0.00196885
	A15.382.680.Phagocytes	4.26492e-09	1.59755e-09	0.00379634
	A15.378.316.Bone.Marrow.Cells	4.52865e-09	1.71956e-09	0.00422422
	A15.382.490.315.583.Neutrophils	3.05273e-09	1.21662e-09	0.00605035
	A15.382.812.260.Dendritic.Cells	4.16867e-09	1.70208e-09	0.00715948
	A15.378.316.580.Monocytes	4.17188e-09	1.7729e-09	0.00930796
	A15.382.812.Mononuclear.Phagocyte.System	3.69985e-09	1.66308e-09	0.0130509
	Whole_Blood	3.49501e-09	1.63313e-09	0.0161747
	A15.145.229.Blood.Cells	1.97929e-09	9.43257e-10	0.0179367
	A15.145.300.Fetal.Blood	3.33001e-09	1.70731e-09	0.0255617
	A10.165.114.830.750.Subcutaneous.Fat	1.48756e-09	7.72912e-10	0.027139
	Spleen	2.79445e-09	1.5986e-09	0.0402269
	Artery_Coronary	1.31097e-09	7.58584e-10	0.0419781
	A15.382.812.522.Macrophages	2.40662e-09	1.41287e-09	0.0442513
	A11.329.372.600.Macrophages..Alveolar	2.33573e-09	1.40329e-09	0.0480097
	Brain_Substantia_nigra	1.1322e-09	6.80607e-10	0.0481048

## Sheet: ST-4
	Supplementary Table 4: AD-MG-Genome-side significant independent SNPs/loci
	Independent SNPs	Genomic loci	Lead SNPs	CHR	BP		EA	NEA	EAF	BETA	SE	P-AD	EA	NEA	BETA	SE	EAF	P-MG	SNP	#STUDY	PVALUE_FE	BETA_FE	STD_FE	PVALUE_RE	BETA_RE	STD_RE	PVALUE_RE2	STAT1_RE2	STAT2_RE2	PVALUE_BE	I_SQUARE	Q	PVALUE_Q	TAU_SQUARE	P-AD	P-MG	M-val-AD	M-val-MG
	rs9268399	1		6	32340236	#	A	G	0.330859	-0.0119751	0.00230271	1.98839e-07	A	G	-0.0927953	0.0234	0.331687	7.28e-05	rs9268399	2	2.63982e-08	-0.0127502	0.00229165	0.223405	-0.0490305	0.0402706	8.02485e-09	30.9557	3.00587	7.05561e-08	91.536	11.8147	0.000587647	0.00298952	1.98839e-07	7.32081e-05	0.998	0.934
	rs2076523	1		6	32370835	#	C	T	0.347028	-0.0122136	0.00226849	7.28366e-08	C	T	-0.0825993	0.0228	0.359635	0.0002864	rs2076523	2	1.08898e-08	-0.0129036	0.00225735	0.211329	-0.0437502	0.0350024	8.77979e-09	32.6756	1.1068	2.98334e-08	89.4031	9.43671	0.00212684	0.00221458	7.28366e-08	0.000291458	1	0.926
	rs2395175	1		6	32405026	#	A	G	0.140176	-0.0167175	0.00314475	1.06062e-07	A	G	-0.1268	0.0369	0.187338	0.0005947	rs2395175	2	2.28888e-08	-0.0175113	0.00313339	0.230268	-0.0656192	0.0546977	2.62872e-08	31.2326	0.336294	6.53494e-08	88.6823	8.83569	0.00295395	0.00537333	1.06062e-07	0.000589686	1	0.898
	rs9268831	1		6	32427748	#	C	T	0.496042	0.0115577	0.00215675	8.37604e-08	T	C	-0.127799	0.0269	0.416461	2.114e-06	rs9268831	2	1.05659e-08	0.0123001	0.00214985	0.251269	0.0665858	0.0580383	2.16629e-10	32.7342	8.43088	2.80753e-08	94.6103	18.5538	1.65172e-05	0.00639189	8.37604e-08	2.02521e-06	0.971	0.939
	rs9270505	1		6	32559216	#	A	G	0.477718	0.0101854	0.00218243	3.05645e-06	A	G	0.138796	0.0281	0.427975	7.786e-07	rs9270505	2	4.76731e-07	0.0109565	0.00217588	0.266055	0.0714394	0.0642329	3.25529e-09	25.3557	10.4047	4.976e-07	95.1975	20.8223	5.03922e-06	0.00787316	3.05645e-06	7.83796e-07	0.257	0.98
	rs9270587	1		6	32561305	#	T	G	0.462242	0.0117105	0.00216792	6.60042e-08	T	G	0.135204	0.0313	0.318803	1.522e-05	rs9270587	2	1.29076e-08	0.0123001	0.00216274	0.259307	0.0695097	0.0616204	1.17735e-09	32.3452	5.44328	3.65619e-08	93.5453	15.4925	8.28339e-05	0.00713313	6.60042e-08	1.563e-05	0.994	0.907
	rs2858861	1		6	32580331	#	T	C	0.420157	-0.0118118	0.00218493	6.44411e-08	T	C	-0.0741957	0.0227	0.479126	0.001096	rs2858861	2	1.23875e-08	-0.0123844	0.00217488	0.208256	-0.038912	0.0309224	1.80696e-08	32.4251	0	3.45643e-08	86.6368	7.48323	0.00622764	0.00168585	6.44411e-08	0.00108107	1	0.908
	rs9271375	1		6	32587067	#	A	G	0.463151	-0.0114425	0.00216312	1.22447e-07	A	G	-0.128004	0.0289	0.416383	9.453e-06	rs9271375	2	2.07482e-08	-0.0120919	0.00215709	0.2554	-0.0661606	0.0581718	1.28302e-09	31.4232	6.19383	5.72067e-08	93.8182	16.1766	5.77012e-05	0.00637335	1.22447e-07	9.45815e-06	0.987	0.919
	rs9271557	1		6	32590331	#	T	C	0.499107	0.0114423	0.00215928	1.16358e-07	T	C	0.110799	0.0273	0.40899	4.823e-05	rs9271557	2	2.11113e-08	0.01206	0.00215256	0.246632	0.0573935	0.0495383	4.54481e-09	31.3896	3.70551	5.73435e-08	92.403	13.1632	0.000285505	0.0045609	1.16358e-07	4.93738e-05	0.997	0.913
	rs5002178	1		6	32611590	#	G	A	0.38203	0.010978	0.00222241	7.82524e-07	G	A	0.120499	0.0274	0.411694	1.086e-05	rs5002178	2	1.29861e-07	0.0116938	0.00221513	0.254078	0.0623336	0.0546545	8.05163e-09	27.8683	6.08667	3.58723e-07	93.6998	15.8725	6.77552e-05	0.00561958	7.82524e-07	1.09367e-05	0.938	0.924
	rs889555	2		16	31122571	#	T	C	0.290222	-0.0129449	0.00238003	5.35961e-08	C	T	-0.0826971	0.0236	0.722774	0.0004592	rs889555	2	4.19485e-07	-0.0119819	0.00236802	0.502695	0.031994	0.0477341	1.77984e-08	25.6025	6.85256	1.44927e-07	93.8493	16.2584	5.52634e-05	0.00429238	5.35961e-08	0.000458128	0.999	0.215
	rs3806156			6	32373698		T	G	0.347028	-0.0121189	0.00226849	9.17945e-08	T	G	-0.0817959	0.0228	0.359635	0.0003295	rs3806156	2	1.41799e-08	-0.0128019	0.00225735	0.211709	-0.043264	0.0346422	1.22303e-08	32.1625	0.959114	3.95538e-08	89.1864	9.24765	0.00235798	0.00216495	9.17945e-08	0.000333813	1	0.924
	rs9270522			6	32559541		T	A	0.360425	0.0120646	0.00224942	8.16493e-08	T	A	0.137699	0.0322	0.315805	1.865e-05	rs9270522	2	1.61932e-08	0.0126748	0.00224395	0.258853	0.0707755	0.0626828	1.69071e-09	31.9046	5.16217	4.52769e-08	93.399	15.1492	9.93382e-05	0.00737105	8.16493e-08	1.89968e-05	0.994	0.906
	rs9270584			6	32561277		C	T	0.354543	0.0121339	0.00225558	7.46934e-08	C	T	0.117899	0.0309	0.318795	0.0001338	rs9270584	2	1.67111e-08	0.0126944	0.00224959	0.250681	0.0605267	0.0526916	7.3838e-09	31.8435	2.2841	4.6554e-08	91.419	11.6536	0.000640784	0.00511318	7.46934e-08	0.000135907	0.999	0.895
	rs9270622			6	32565329		C	T	0.281136	0.0129546	0.0023997	6.72376e-08	C	T	0.119701	0.0305	0.318656	8.826e-05	rs9270622	2	1.27336e-08	0.0136113	0.00239231	0.243847	0.0619975	0.0531973	4.23569e-09	32.3716	2.86394	3.48215e-08	91.7857	12.1738	0.000484648	0.0052294	6.72376e-08	8.68657e-05	0.999	0.909
	rs9270624			6	32565413		G	C	0.286526	0.0127527	0.00238602	9.05482e-08	G	C	0.119302	0.0305	0.318665	9.403e-05	rs9270624	2	1.76562e-08	0.0134008	0.00237876	0.245318	0.0616887	0.0530977	5.96619e-09	31.7366	2.81593	4.84029e-08	91.7558	12.1298	0.000496237	0.00520841	9.05482e-08	9.17091e-05	0.999	0.907
	rs28752490			6	32567897		A	G	0.340776	-0.0121096	0.00227766	1.05668e-07	A	G	-0.067305	0.0249	0.354705	0.006934	rs28752490	2	3.01067e-08	-0.0125676	0.00226819	0.206601	-0.0341378	0.0270298	3.79923e-08	30.7006	0	8.56814e-08	79.4783	4.8729	0.0272816	0.00121066	1.05668e-07	0.00687143	1	0.871
	rs9270824			6	32570055		T	G	0.476224	0.0259587	0.00528882	9.19053e-07	T	G	0.136496	0.034	0.319873	5.868e-05	rs9270824	2	4.57819e-08	0.0285702	0.00522597	0.166583	0.0761249	0.0550326	1.70392e-08	29.8877	2.67213	1.20191e-07	90.31	10.3199	0.00131602	0.00551726	9.19052e-07	5.95497e-05	0.997	0.973
	rs9270848			6	32570609		C	T	0.426332	0.0118688	0.00218307	5.42713e-08	C	T	0.123297	0.0307	0.319916	5.904e-05	rs9270848	2	1.14382e-08	0.0124294	0.00217757	0.253968	0.0633751	0.055555	2.84625e-09	32.5801	3.4481	3.19724e-08	92.3708	13.1076	0.0002941	0.0057345	5.42713e-08	5.91468e-05	0.999	0.901
	rs9270902			6	32571962		A	G	0.372359	0.0120288	0.00223199	7.07389e-08	A	G	0.107104	0.03	0.319795	0.0003558	rs9270902	2	1.70728e-08	0.0125522	0.00222584	0.246162	0.0548595	0.047304	1.53926e-08	31.8019	0.970168	4.70454e-08	89.9883	9.98836	0.00157533	0.00406715	7.07389e-08	0.0003568	1	0.888
	rs9270977			6	32573748		A	G	0.282723	0.0128665	0.00239468	7.74676e-08	A	G	0.111702	0.03	0.322674	0.0001974	rs9270977	2	1.58441e-08	0.0134922	0.00238709	0.240498	0.0577602	0.0492103	9.16592e-09	31.947	1.74962	4.47335e-08	90.728	10.7851	0.00102319	0.00443136	7.74676e-08	0.000196558	0.999	0.903
	rs643889			6	32575918		T	A	0.33879	-0.0120596	0.00227881	1.20939e-07	A	T	0.0707007	0.0246	0.645314	0.004102	rs643889	2	3.11925e-08	-0.0125586	0.0022691	0.20908	-0.0362646	0.0288708	3.94851e-08	30.6319	0	8.80549e-08	82.2509	5.63407	0.0176147	0.00141421	1.20939e-07	0.00405293	1	0.881
	rs482205			6	32576009		G	T	0.337681	-0.0122103	0.00228505	9.11336e-08	T	G	0.071902	0.0246	0.645326	0.003514	rs482205	2	2.25766e-08	-0.0127209	0.00227525	0.208136	-0.0370308	0.0294197	3.03811e-08	31.2593	0	6.37319e-08	82.8694	5.83749	0.0156882	0.00147636	9.11336e-08	0.00346849	1	0.885
	rs482162			6	32576019		C	T	0.337019	-0.0122467	0.00228588	8.43711e-08	T	C	0.0709989	0.0247	0.645326	0.003977	rs482162	2	2.14832e-08	-0.0127456	0.00227616	0.207246	-0.0364752	0.0289216	2.89125e-08	31.3557	0	5.98497e-08	82.1742	5.60985	0.0178598	0.00141826	8.4371e-08	0.00404733	1	0.882
	rs532098			6	32578052		A	G	0.419726	-0.0113465	0.00218555	2.08518e-07	A	G	-0.0751008	0.0226	0.479113	0.0009104	rs532098	2	4.08036e-08	-0.0119372	0.00217541	0.214564	-0.0392554	0.0316292	4.97242e-08	30.1109	0	1.13688e-07	87.3165	7.88424	0.00498675	0.00177454	2.08518e-07	0.000890408	1	0.906
	rs502803			6	32578958		A	G	0.420142	-0.0114502	0.00218493	1.60128e-07	A	G	-0.0720977	0.0227	0.479126	0.001518	rs502803	2	3.37632e-08	-0.0120069	0.00217488	0.210968	-0.0375651	0.0300302	4.23273e-08	30.4782	0	9.39246e-08	85.8606	7.07244	0.00782785	0.00157903	1.60128e-07	0.00149264	1	0.9
	rs13207945			6	32579708		C	T	0.412458	-0.0116274	0.00219084	1.11269e-07	C	T	-0.0713993	0.0227	0.479113	0.001694	rs13207945	2	2.33832e-08	-0.0121791	0.00218071	0.207997	-0.037243	0.0295793	3.15048e-08	31.1911	0	6.5318e-08	85.4426	6.86934	0.00876868	0.00152629	1.11269e-07	0.00165892	1	0.9
	rs13208027			6	32579743		A	T	0.419372	-0.0115259	0.00218559	1.33772e-07	A	T	-0.0713993	0.0227	0.479126	0.001684	rs13208027	2	2.84412e-08	-0.0120758	0.00217552	0.209335	-0.0371993	0.0296316	3.65964e-08	30.8111	0	7.88964e-08	85.4925	6.89301	0.00865337	0.00153238	1.33771e-07	0.00165892	1	0.899
	rs12523808			6	32579775		T	A	0.419495	-0.0115849	0.00218555	1.15375e-07	T	A	-0.0713027	0.0227	0.479126	0.001709	rs12523808	2	2.44269e-08	-0.0121334	0.00217549	0.208468	-0.0371694	0.0295514	3.25224e-08	31.1064	0	6.94332e-08	85.4169	6.85723	0.00882832	0.00152308	1.15375e-07	0.00168321	1	0.9
	rs3104419			6	32580136		T	C	0.419787	-0.01165	0.00218526	9.75669e-08	T	C	-0.0720977	0.0227	0.479126	0.001503	rs3104419	2	2.01146e-08	-0.0122051	0.0021752	0.208362	-0.0376511	0.0299274	2.69583e-08	31.4835	0	5.58135e-08	85.7669	7.02589	0.00803397	0.00156693	9.75669e-08	0.00149264	1	0.902
	rs9271367			6	32586908		G	A	0.285771	0.0127519	0.00238687	9.16646e-08	G	A	0.104603	0.0249	0.364891	2.551e-05	rs9271367	2	1.07156e-08	0.0135882	0.00237598	0.227026	0.0553334	0.0458037	1.69435e-09	32.7069	4.35559	2.90179e-08	92.5834	13.4834	0.00024069	0.00390546	9.16646e-08	2.65828e-05	0.998	0.941
	rs28383312			6	32587090		T	C	0.34441	-0.0121445	0.00226966	8.75744e-08	T	C	-0.0635044	0.0244	0.365597	0.009212	rs28383312	2	2.56445e-08	-0.012585	0.00225991	0.199961	-0.0320786	0.0250289	3.40923e-08	31.012	0	7.2375e-08	77.2348	4.39266	0.0360939	0.00101867	8.75744e-08	0.00925092	1	0.868
	rs55766044			16	31117698		T	C	0.282876	-0.0128935	0.00239814	7.59693e-08	C	T	-0.0849045	0.0236	0.722799	0.0003264	rs55766044	2	6.18986e-07	-0.011894	0.00238586	0.496617	0.0331874	0.0488177	1.8516e-08	24.8522	7.51659	2.08464e-07	94.1166	16.9971	3.74373e-05	0.00450087	7.59693e-08	0.000321107	0.998	0.21
	rs2884738			16	31126321		A	C	0.290299	-0.012797	0.00237963	7.54267e-08	C	A	-0.0827948	0.0236	0.722774	0.0004562	rs2884738	2	5.7733e-07	-0.0118349	0.00236762	0.500851	0.0321153	0.0477088	2.36329e-08	24.9865	6.83735	2.06123e-07	93.8429	16.2414	5.57612e-05	0.00428759	7.54267e-08	0.000451058	0.998	0.219
	rs61320757			16	31134059		A	G	0.287388	-0.0129573	0.00238579	5.60246e-08	G	A	-0.0816006	0.0236	0.723774	0.0005599	rs61320757	2	4.28737e-07	-0.0120007	0.00237369	0.505698	0.0314067	0.047189	2.0724e-08	25.5605	6.53608	1.53907e-07	93.7072	15.8912	6.7091e-05	0.00418927	5.60247e-08	0.000544904	0.999	0.218
	rs1549299			16	31154146		G	A	0.310687	-0.01259	0.00233379	6.8654e-08	G	A	0.0778958	0.0236	0.296163	0.0009762	rs1549299	2	4.5672e-07	-0.0117137	0.00232246	0.511917	0.0296054	0.0451401	3.70957e-08	25.4385	5.33668	1.87261e-07	93.1311	14.5583	0.000135889	0.00381264	6.8654e-08	0.000964544	0.999	0.242

## Sheet: ST-5
	Supplementary Table 5: AD loci with cross-trait associations in MG
	SNP		CHR	BP	EA	NEA	EAF	BETA	SE	P-AD	EA	NEA	BETA	SE	EAF	P-MG	SNP	#STUDY	PVALUE_FE	BETA_FE	STD_FE	PVALUE_RE	BETA_RE	STD_RE	PVALUE_RE2	STAT1_RE2	STAT2_RE2	PVALUE_BE	I_SQUARE	Q	PVALUE_Q	TAU_SQUARE	PVAL_AD	PVAL_MG	M_val_AD	M_val_MG
	rs13201473	#	6	47489708	A	G	0.256575	0.014089	0.00246968	1.16495e-08	A	G	0.0728043	0.0293	0.242173	0.01313	rs13201473	2	3.78508e-09	0.0145032	0.00246095	0.203317	0.036188	0.0284462	5.45469e-09	34.7312	0	1.03346e-08	74.9212	3.98743	0.045841	0.00129145	1.16495e-08	0.0129628	1	0.856
	rs6979218	#	7	99893148	C	G	0.266816	-0.0171582	0.00246069	3.10366e-12	C	G	-0.0499994	0.0252	0.2539	0.04736	rs6979218	2	9.83725e-13	-0.0174684	0.00244904	0.0719528	-0.0240027	0.0133391	1.66871e-12	50.8763	0	2.77516e-12	40.5591	1.68234	0.194613	0.000218723	3.10366e-12	0.0472443	1	0.86
	rs35251323	#	7	143095256	G	A	0.350077	0.0142871	0.00226067	2.61785e-10	A	G	-0.0646985	0.0226	0.624088	0.004242	rs35251323	2	4.91705e-11	0.0147866	0.00224945	0.162787	0.0344776	0.0247017	7.77345e-11	43.2099	0	1.35906e-10	79.7006	4.92624	0.0264518	0.00101272	2.61785e-10	0.00419961	1	0.911
	rs62472729	#	7	143116061	C	G	0.331029	0.0128502	0.00230693	2.5439e-08	G	C	-0.0561049	0.0265	0.635155	0.03449	rs62472729	2	9.8748e-09	0.0131755	0.00229824	0.188039	0.0264214	0.0200709	1.46023e-08	32.8657	0	2.68546e-08	62.1816	2.64422	0.103927	0.0005817	2.54389e-08	0.0342458	1	0.833
	rs3752241	#	19	1053524	G	C	0.168725	-0.0182398	0.00290501	3.41286e-10	C	G	0.080704	0.0301	0.819238	0.007389	rs3752241	2	7.65183e-11	-0.0188163	0.00289157	0.16414	-0.0422872	0.0303945	1.19927e-10	42.3448	0	2.09816e-10	76.5632	4.2668	0.0388641	0.00149366	3.41286e-10	0.00733595	1	0.896
	rs2965158	#	19	45195928	T	C	0.01118	0.0627503	0.0109424	9.7744e-09	T	C	0.232801	0.117	0.019641	0.04651	rs2965158	2	3.74763e-09	0.0642248	0.0108949	0.150781	0.107878	0.0750832	5.40198e-09	34.7506	0	1.03476e-08	52.2474	2.09413	0.147866	0.00755425	9.7744e-09	0.0466182	1	0.835
	rs1871046	#	19	45351937	C	T	0.395288	-0.0213878	0.00221149	3.99624e-22	C	T	-0.0652961	0.0269	0.39587	0.01514	rs1871046	2	7.75546e-23	-0.0216826	0.00220406	0.0843804	-0.0351576	0.0203716	1.75095e-22	96.778	0	2.06645e-22	62.2135	2.64645	0.103782	0.000599719	3.99623e-22	0.015209	1	0.91
	rs143668237	#	19	45486687	C	G	0.042701	0.0539699	0.00533673	4.8427e-24	C	G	0.0987044	0.0492	0.0414887	0.04496	rs143668237	2	9.59322e-25	0.0544901	0.00530561	9.59322e-25	0.0544901	0.00530561	2.25234e-24	105.479	0	2.79831e-24	0	0.817101	0.366029	0	4.8427e-24	0.0448363	1	0.908
	rs874744	#	19	45513417	T	C	0.0300277	0.0719683	0.00671291	8.12358e-27	C	T	-0.1786	0.0869	0.978972	0.03998	rs874744	2	2.05365e-27	0.0726008	0.00669297	0.0244758	0.0900857	0.0400456	5.06875e-27	117.664	0	5.73667e-27	33.1886	1.49675	0.221172	0.00188683	8.12358e-27	0.0398562	1	0.886
	rs7251911	#	19	45582402	G	C	0.0819526	0.025198	0.00395382	1.85273e-10	C	G	-0.111502	0.0512	0.941889	0.02951	rs7251911	2	6.94527e-11	0.0257096	0.00394208	0.187727	0.0532533	0.0404251	1.09061e-10	42.5343	0	1.87885e-10	64.5954	2.82449	0.0928365	0.00240565	1.85273e-10	0.0294229	1	0.839
	rs59735493	#	16	31133100	A	G	0.298476	-0.0129852	0.00235955	3.72816e-08	G	A	-0.0851985	0.0235	0.719737	0.0002839	rs59735493	2	3.16183e-07	-0.0120053	0.00234774	0.496583	0.0333227	0.0490129	8.30753e-09	26.1483	7.74433	1.0264e-07	94.2135	17.2817	3.22273e-05	0.00454111	3.72816e-08	0.000288439	0.999	0.202
	rs3806157		6	32373801	G	T	0.336988	-0.0128196	0.00228453	2.00601e-08	G	T	-0.0840993	0.0229	0.358544	0.0002397	rs3806157	2	2.709e-09	-0.013522	0.00227325	0.206184	-0.0448175	0.0354533	2.11804e-09	35.3826	1.23485	7.51413e-09	89.5759	9.59312	0.00195308	0.00227558	2.00601e-08	0.000240228	1	0.933
	rs9268543		6	32384801	T	A	0.139637	-0.0172052	0.00312583	3.70818e-08	T	A	-0.117996	0.0368	0.185358	0.001352	rs9268543	2	8.62103e-09	-0.0179272	0.00311461	0.222545	-0.060931	0.0499521	1.21808e-08	33.1297	0	2.41442e-08	86.5731	7.44773	0.00635166	0.00439738	3.70818e-08	0.00134401	1	0.891
	rs9270805		6	32569556	T	A	0.27801	0.0132057	0.00240743	4.12562e-08	T	A	0.119302	0.0305	0.318656	9.195e-05	rs9270805	2	7.64205e-09	0.0138626	0.00239997	0.241693	0.0618972	0.0528689	2.7305e-09	33.3641	2.74682	2.14023e-08	91.6843	12.0255	0.000524774	0.00516019	4.12562e-08	9.17091e-05	0.999	0.911
	rs9270836		6	32570325	A	G	0.342932	0.0125354	0.00227236	3.45861e-08	A	G	0.1144	0.0306	0.318767	0.0001887	rs9270836	2	7.55069e-09	0.0130941	0.00226612	0.245617	0.058897	0.0507268	4.34177e-09	33.3875	1.79867	2.02439e-08	90.9263	11.0209	0.000900927	0.00471743	3.45861e-08	0.000185076	1	0.897
	rs9270839		6	32570375	A	C	0.399661	0.0121992	0.00220322	3.07764e-08	A	C	0.1201	0.0318	0.319886	0.0001624	rs9270839	2	7.2616e-09	0.0127146	0.00219795	0.25264	0.0614861	0.0537485	3.74098e-09	33.4634	2.01969	2.0387e-08	91.2726	11.4582	0.000711799	0.00531325	3.07764e-08	0.000158901	1	0.89
	rs9270842		6	32570461	C	T	0.283646	0.0132117	0.0023927	3.35846e-08	C	T	0.119	0.0305	0.318656	9.512e-05	rs9270842	2	6.25204e-09	0.0138587	0.00238538	0.241532	0.0617361	0.0527134	2.32427e-09	33.7546	2.67753	1.77046e-08	91.6365	11.9567	0.000544512	0.0051276	3.35846e-08	9.55434e-05	1	0.911
	rs9270845		6	32570571	T	C	0.407222	0.0120303	0.00219816	4.42747e-08	T	C	0.118902	0.0319	0.319895	0.0001925	rs9270845	2	1.08945e-08	0.0125354	0.00219296	0.253888	0.0607279	0.0532254	6.28772e-09	32.6747	1.77318	3.09645e-08	91.0481	11.1709	0.000830918	0.00519956	4.42747e-08	0.000193515	1	0.886
	rs9270847		6	32570602	G	T	0.436526	0.0118923	0.00217721	4.7042e-08	G	T	0.122899	0.0307	0.319935	6.208e-05	rs9270847	2	9.94568e-09	0.0124478	0.00217176	0.253674	0.0631718	0.0553424	2.59651e-09	32.8518	3.35944	2.77378e-08	92.313	13.009	0.000310001	0.00568763	4.7042e-08	6.24849e-05	0.999	0.9
	rs9270850		6	32570717	G	A	0.285448	0.0132034	0.00238811	3.22365e-08	G	A	0.119497	0.0305	0.318656	8.893e-05	rs9270850	2	5.96282e-09	0.0138511	0.00238082	0.241788	0.0620012	0.0529685	2.11967e-09	33.8468	2.76912	1.63089e-08	91.716	12.0715	0.000511996	0.00518118	3.22365e-08	8.9311e-05	1	0.911
	rs9270852		6	32570797	G	A	0.45773	0.0118814	0.00216903	4.30735e-08	G	A	0.123199	0.0307	0.319981	6.114e-05	rs9270852	2	9.08595e-09	0.0124343	0.00216363	0.253844	0.063328	0.0554992	2.31322e-09	33.0276	3.41404	2.49139e-08	92.3562	13.0824	0.000298079	0.00572221	4.30735e-08	5.99527e-05	0.999	0.9
	rs9270865		6	32571011	G	C	0.294164	0.0130564	0.0023669	3.46304e-08	G	C	0.121704	0.0305	0.318684	6.491e-05	rs9270865	2	6.30542e-09	0.0137068	0.00235981	0.243778	0.0631249	0.0541569	1.79937e-09	33.7381	3.2045	1.73111e-08	92.0719	12.6134	0.000382987	0.00543422	3.46304e-08	6.59911e-05	0.999	0.913
	rs9270866		6	32571043	G	A	0.285186	0.0131677	0.00238869	3.53688e-08	G	A	0.119896	0.0305	0.318665	8.367e-05	rs9270866	2	6.52784e-09	0.0138184	0.00238139	0.242224	0.0622006	0.0531881	2.22117e-09	33.6706	2.85197	1.78605e-08	91.7833	12.1704	0.000485548	0.00522748	3.53688e-08	8.45875e-05	0.999	0.911
	rs9270874		6	32571227	G	A	0.283477	0.0131694	0.00239288	3.72152e-08	G	A	0.119497	0.0305	0.318656	8.937e-05	rs9270874	2	6.90733e-09	0.0138199	0.00238555	0.242059	0.0619857	0.0529857	2.43421e-09	33.5607	2.77925	1.88853e-08	91.7211	12.0789	0.000509958	0.00518479	3.72152e-08	8.9311e-05	0.999	0.911
	rs9270907		6	32572082	C	T	0.431906	0.0124204	0.00221625	2.09156e-08	C	T	0.105297	0.0313	0.319947	0.0007608	rs9270907	2	5.61415e-09	0.0128837	0.00221071	0.245276	0.053611	0.0461408	8.0152e-09	33.964	0	1.58042e-08	88.5857	8.76097	0.00307746	0.00382073	2.09156e-08	0.000767878	1	0.877
	rs9270921		6	32572326	C	T	0.481136	0.0120376	0.00216651	2.75695e-08	C	T	0.115603	0.0302	0.319991	0.0001298	rs9270921	2	6.03183e-09	0.0125678	0.00216095	0.249322	0.0594397	0.0515971	2.72845e-09	33.8244	2.28807	1.68465e-08	91.453	11.7	0.000624996	0.00490453	2.75695e-08	0.000129234	1	0.897
	rs9270922		6	32572388	T	C	0.322067	0.0126514	0.00230786	4.20824e-08	T	C	0.110002	0.029	0.318708	0.0001458	rs9270922	2	8.14062e-09	0.0132641	0.00230059	0.239467	0.0570346	0.0484857	4.05719e-09	33.2412	2.08013	2.3042e-08	91.0698	11.198	0.000818871	0.0043154	4.20824e-08	0.000148735	1	0.908
	rs9270926		6	32572435	C	A	0.493933	0.0120876	0.00217495	2.73437e-08	C	A	0.1222	0.0301	0.320047	5.041e-05	rs9270926	2	5.35386e-09	0.0126596	0.0021693	0.250806	0.0630513	0.0549039	1.22452e-09	34.0564	3.65378	1.50281e-08	92.4886	13.3131	0.000263565	0.005607	2.73437e-08	4.91146e-05	0.999	0.907
	rs9270931		6	32572547	A	T	0.284601	0.013129	0.00238989	3.93897e-08	A	T	0.108101	0.0288	0.31864	0.0001742	rs9270931	2	7.24447e-09	0.0137785	0.00238171	0.233995	0.0562783	0.0472875	4.08785e-09	33.468	1.8383	2.04622e-08	90.7408	10.8	0.00101498	0.00409226	3.93897e-08	0.000174378	1	0.912
	rs9271013		6	32574703	G	C	0.443779	0.0125107	0.00219067	1.12366e-08	G	C	0.137202	0.0359	0.321048	0.0001306	rs9271013	2	2.97274e-09	0.0129733	0.0021866	0.261898	0.0697076	0.0621327	1.40676e-09	35.2016	2.23182	8.36139e-09	91.6799	12.019	0.000526605	0.00712715	1.12366e-08	0.00013249	1	0.879
	rs482044		6	32576064	C	G	0.230582	-0.014543	0.00259268	2.0321e-08	G	C	0.0495042	0.0245	0.622267	0.04371	rs482044	2	7.00783e-09	-0.0149302	0.00257828	0.123529	-0.0235352	0.0152813	9.9516e-09	33.5326	0	1.89033e-08	50.3413	2.01375	0.15588	0.000307658	2.0321e-08	0.0433233	1	0.848
	rs646984		6	32576592	C	A	0.18862	-0.0156863	0.00278504	1.77773e-08	A	C	0.0716972	0.0255	0.59183	0.004922	rs646984	2	3.54109e-09	-0.0163465	0.00276857	0.166154	-0.0379563	0.0274119	5.11106e-09	34.861	0	9.7501e-09	79.0258	4.76777	0.0289974	0.00123961	1.77774e-08	0.00492874	1	0.905
	rs116457146		6	32578632	T	C	0.249569	-0.016017	0.00249209	1.30043e-10	T	C	-0.106695	0.0334	0.311301	0.001409	rs116457146	2	2.99138e-11	-0.016519	0.00248518	0.218848	-0.055239	0.0449245	4.77448e-11	44.1825	0	8.2134e-11	86.3573	7.32994	0.00678154	0.00355037	1.30043e-10	0.00140092	1	0.894
	rs79267592		6	32578673	A	T	0.278719	0.0132828	0.00240536	3.34875e-08	A	T	0.1268	0.032	0.318602	7.51e-05	rs79267592	2	6.48946e-09	0.0139206	0.0023986	0.246608	0.0655565	0.0565811	1.99204e-09	33.6821	3.05761	1.80908e-08	92.0086	12.5134	0.000404035	0.00592819	3.34875e-08	7.4169e-05	0.999	0.908
	rs2395516		6	32580657	C	T	0.29287	-0.0150981	0.00236973	1.87503e-10	C	T	-0.113303	0.0247	0.378644	4.544e-06	rs2395516	2	1.20006e-11	-0.0159938	0.0023589	0.212303	-0.0611229	0.0490059	8.57172e-13	45.9712	6.23505	3.06278e-11	93.6158	15.6636	7.56645e-05	0.00451425	1.87503e-10	4.49303e-06	1	0.967
	rs1846190		6	32583813	A	G	0.284078	-0.0155114	0.00239182	8.86305e-11	A	G	-0.0682039	0.0252	0.330231	0.006721	rs1846190	2	1.92117e-11	-0.0159818	0.00238112	0.161967	-0.035886	0.0256606	3.09204e-11	45.0495	0	5.29377e-11	76.922	4.33313	0.0373774	0.00106787	8.86305e-11	0.00679958	1	0.899
	rs9271487		6	32588985	G	T	0.391007	0.012098	0.00221032	4.41478e-08	G	T	0.103603	0.0267	0.407735	0.0001024	rs9271487	2	7.70126e-09	0.0127208	0.00220279	0.236371	0.0539818	0.0455887	3.04812e-09	33.3491	2.54241	2.10184e-08	91.4277	11.6654	0.000636719	0.0038277	4.41478e-08	0.000104344	0.999	0.916
	rs55796551		7	99777422	A	G	0.256021	-0.0161356	0.00251625	1.43093e-10	G	A	0.0603987	0.0261	0.765138	0.02045	rs55796551	2	3.97412e-11	-0.0165432	0.00250464	0.140246	-0.0306437	0.0207771	6.30863e-11	43.6265	0	1.11237e-10	64.9074	2.8496	0.0913964	0.00063584	1.43093e-10	0.0206608	1	0.874
	rs12666107		7	99778019	C	G	0.256036	-0.0160309	0.00251621	1.87762e-10	G	C	0.0595982	0.0261	0.765138	0.02216	rs12666107	2	5.35368e-11	-0.0164321	0.0025046	0.139712	-0.0300693	0.0203602	8.44974e-11	43.0435	0	1.48016e-10	63.7776	2.76073	0.0966044	0.000605286	1.87762e-10	0.0224035	1	0.872
	rs3779046		7	99779243	G	A	0.280782	-0.0154767	0.00244013	2.25959e-10	G	A	-0.0638028	0.0246	0.2677	0.009458	rs3779046	2	5.11298e-11	-0.0159476	0.00242821	0.152181	-0.0334401	0.0233542	8.07708e-11	43.1335	0	1.40433e-10	73.8327	3.82156	0.050597	0.000862149	2.25959e-10	0.00949742	1	0.895
	rs3779045		7	99779259	C	T	0.280782	-0.0154734	0.00244013	2.27959e-10	C	T	-0.0638987	0.0246	0.2677	0.009312	rs3779045	2	5.14624e-11	-0.0159452	0.00242821	0.152417	-0.0334991	0.0234089	8.12859e-11	43.1208	0	1.42998e-10	73.9398	3.83727	0.050125	0.000866949	2.27959e-10	0.00939029	1	0.895
	rs6465764		7	99779886	A	G	0.280767	-0.0155044	0.0024411	2.13379e-10	A	G	-0.0638987	0.0246	0.2677	0.009323	rs6465764	2	4.80541e-11	-0.0159763	0.00242917	0.151976	-0.0335107	0.0233918	7.60034e-11	43.2549	0	1.29342e-10	73.9062	3.83233	0.0502731	0.000865444	2.13379e-10	0.00939029	1	0.895
	rs10252884		7	99780655	C	T	0.273637	-0.0152921	0.00246239	5.28866e-10	C	T	-0.0671018	0.0265	0.253081	0.01125	rs10252884	2	1.38139e-10	-0.0157356	0.00245183	0.168167	-0.0344783	0.0250184	2.13963e-10	41.1898	0	3.74143e-10	73.6121	3.78962	0.0515713	0.000987964	5.28866e-10	0.0113368	1	0.881
	rs7788301		7	99782753	G	C	0.280767	-0.0155085	0.00244124	2.1155e-10	G	C	-0.0628972	0.0246	0.267713	0.01043	rs7788301	2	4.89316e-11	-0.0159706	0.0024293	0.149895	-0.0328807	0.0228353	7.73642e-11	43.2195	0	1.37669e-10	72.787	3.67472	0.0552436	0.000817286	2.1155e-10	0.0105641	1	0.893
	rs6960458		7	99783714	T	G	0.28069	-0.0143874	0.00258349	2.56219e-08	T	G	-0.0636962	0.0246	0.2677	0.00954	rs6960458	2	6.28584e-09	-0.0149253	0.00256936	0.167627	-0.0329731	0.0238958	8.94982e-09	33.7441	0	1.80328e-08	74.8357	3.97388	0.0462112	0.000909761	2.56219e-08	0.00961779	1	0.886
	rs6465765		7	99785443	A	G	0.278919	-0.0154325	0.00244627	2.81584e-10	A	G	-0.0644959	0.0246	0.2677	0.008706	rs6465765	2	6.27375e-11	-0.0159129	0.00243426	0.15415	-0.0338581	0.0237596	9.87129e-11	42.7332	0	1.75641e-10	74.612	3.93887	0.0471825	0.000898037	2.81584e-10	0.00874707	1	0.896
	rs6465766		7	99785671	G	A	0.281999	-0.0150634	0.00244013	6.69192e-10	G	A	-0.0628972	0.0246	0.2687	0.01039	rs6465766	2	1.60092e-10	-0.0155295	0.00242822	0.156363	-0.0327169	0.0230822	2.47224e-10	40.9016	0	4.50866e-10	73.2913	3.74409	0.0529945	0.000838477	6.69192e-10	0.0105641	1	0.889
	rs2272344		7	99786819	T	C	0.280921	-0.0154943	0.00243994	2.14905e-10	T	C	-0.0641013	0.0246	0.266726	0.009093	rs2272344	2	4.81738e-11	-0.0159678	0.00242802	0.152518	-0.033634	0.0235089	7.6189e-11	43.25	0	1.3565e-10	74.1343	3.86612	0.0492702	0.000875763	2.14905e-10	0.0091675	1	0.896
	rs11764176		7	99786964	T	G	0.280905	-0.015156	0.00244005	5.25339e-10	T	G	-0.0682039	0.0249	0.266748	0.006241	rs11764176	2	1.12688e-10	-0.0156605	0.00242841	0.16556	-0.0358922	0.0258848	1.7526e-10	41.5879	0	3.0825e-10	77.756	4.4956	0.0339822	0.00109406	5.25338e-10	0.00616053	1	0.9
	rs6948729		7	99787372	G	A	0.281044	-0.0155318	0.00243975	1.93864e-10	G	A	-0.0633978	0.0246	0.266726	0.0098	rs6948729	2	4.41635e-11	-0.015998	0.00242784	0.150585	-0.0332056	0.0231	6.99641e-11	43.4201	0	1.21082e-10	73.3274	3.74916	0.0528341	0.000840023	1.93864e-10	0.00996198	1	0.894
	rs12666425		7	99790677	G	A	0.279412	-0.0156102	0.0024441	1.6931e-10	G	A	-0.0646985	0.0246	0.266726	0.008496	rs12666425	2	3.70034e-11	-0.01609	0.00243213	0.152049	-0.0340512	0.0237733	5.88208e-11	43.7662	0	1.02441e-10	74.6382	3.94294	0.0470684	0.000899266	1.6931e-10	0.00853798	1	0.898
	rs11767968		7	99790971	A	G	0.280844	-0.0144383	0.00240389	1.89891e-09	A	G	-0.0625991	0.0244	0.266726	0.01044	rs11767968	2	4.69938e-10	-0.0149013	0.00239231	0.164198	-0.0323977	0.0232895	7.09606e-10	38.7983	0	1.32426e-09	74.0828	3.85844	0.0494962	0.000859161	1.89891e-09	0.0103016	1	0.886
	rs7811662		7	99792608	G	A	0.279242	-0.0144804	0.00240818	1.82112e-09	G	A	-0.0643999	0.0245	0.266713	0.008439	rs7811662	2	4.33947e-10	-0.0149581	0.00239663	0.16713	-0.0334861	0.0242392	6.56372e-10	38.9538	0	1.21606e-09	75.6798	4.1118	0.0425849	0.000942953	1.82112e-09	0.00857454	1	0.89
	rs3823642		7	99796072	C	T	0.281275	-0.0141887	0.00240301	3.53567e-09	C	T	-0.0635044	0.0244	0.267713	0.009378	rs3823642	2	8.7204e-10	-0.0146625	0.00239144	0.169446	-0.0328689	0.0239223	1.29929e-09	37.5919	0	2.45895e-09	75.2826	4.04574	0.0442829	0.00091545	3.53567e-09	0.00925092	1	0.886
	rs2272345		7	99797031	G	C	0.279704	-0.0142088	0.00240701	3.56704e-09	G	C	-0.0641013	0.0244	0.267713	0.008679	rs2272345	2	8.65059e-10	-0.0146897	0.00239538	0.170137	-0.0332467	0.0242365	1.28911e-09	37.6076	0	2.42234e-09	75.8501	4.1408	0.0418614	0.000944052	3.56704e-09	0.00861154	1	0.888
	rs1043915		7	99799845	A	T	0.280767	-0.0141441	0.00240388	4.0084e-09	A	T	-0.0630996	0.0245	0.266713	0.009988	rs1043915	2	1.01381e-09	-0.0146109	0.00239239	0.169849	-0.0325503	0.0237128	1.50551e-09	37.2981	0	2.80885e-09	74.7134	3.95467	0.0467415	0.000895308	4.0084e-09	0.0100097	1	0.884
	rs1628077		7	99800958	A	G	0.279458	-0.0144743	0.00240744	1.82892e-09	A	G	-0.0635044	0.0244	0.266713	0.009444	rs1628077	2	4.40903e-10	-0.014947	0.00239581	0.165273	-0.0329771	0.0237664	6.66668e-10	38.9228	0	1.21176e-09	74.993	3.99888	0.0455305	0.000901397	1.82892e-09	0.00925092	1	0.889
	rs2950517		7	99803412	G	C	0.279181	-0.0144726	0.00240848	1.8666e-09	G	C	-0.0676045	0.0248	0.262312	0.006379	rs2950517	2	4.25514e-10	-0.014969	0.00239721	0.173501	-0.0353053	0.0259399	6.43885e-10	38.9921	0	1.17977e-09	78.0078	4.54706	0.0329754	0.00110108	1.8666e-09	0.00641093	1	0.894
	rs1727123		7	99803794	C	T	0.280813	-0.0145022	0.00240412	1.61718e-09	C	T	-0.0638028	0.0244	0.266739	0.00902	rs1727123	2	3.86078e-10	-0.0149762	0.00239253	0.165388	-0.033173	0.0239141	5.85416e-10	39.182	0	1.10323e-09	75.2674	4.04324	0.0443486	0.000914706	1.61718e-09	0.00892617	1	0.889
	rs1727125		7	99804125	C	T	0.280798	-0.0144315	0.00240415	1.93997e-09	C	T	-0.0638028	0.0244	0.266739	0.009065	rs1727125	2	4.65748e-10	-0.0149062	0.00239257	0.166412	-0.0331463	0.0239526	7.03413e-10	38.8158	0	1.29171e-09	75.3381	4.05483	0.0440451	0.000918191	1.93997e-09	0.00892617	1	0.889
	rs2528900		7	99805319	A	G	0.280813	-0.014402	0.00240401	2.0875e-09	A	G	-0.0636962	0.0244	0.266739	0.009086	rs2528900	2	5.03724e-10	-0.0148759	0.00239242	0.166658	-0.0330689	0.0239106	7.59494e-10	38.6628	0	1.38662e-09	75.2609	4.04218	0.0443764	0.000914388	2.0875e-09	0.009041	1	0.888
	rs1138417		7	99807146	C	G	0.275701	-0.0145964	0.00241788	1.57162e-09	C	G	-0.0625033	0.0244	0.266739	0.0105	rs1138417	2	3.84931e-10	-0.0150622	0.0024061	0.161676	-0.0323971	0.0231498	5.83714e-10	39.1878	0	1.04926e-09	73.8045	3.81745	0.0507215	0.000846933	1.57162e-09	0.0104188	1	0.887
	rs1061230		7	99807265	G	A	0.280844	-0.0144287	0.00240407	1.95156e-09	G	A	-0.0631954	0.0244	0.266739	0.009679	rs1061230	2	4.75992e-10	-0.0148976	0.00239249	0.1654	-0.0327672	0.0236221	7.18551e-10	38.7733	0	1.32162e-09	74.7228	3.95613	0.0467009	0.000888524	1.95156e-09	0.00959828	1	0.887
	rs1637001		7	99808151	G	A	0.279119	-0.0145699	0.00240926	1.47169e-09	G	A	-0.0638987	0.0244	0.266739	0.008914	rs1637001	2	3.48513e-10	-0.0150462	0.0023976	0.164574	-0.0332585	0.0239296	5.29598e-10	39.3819	0	9.68066e-10	75.2946	4.0477	0.0442315	0.000916085	1.47169e-09	0.00882399	1	0.89
	rs2257213		7	99810113	T	C	0.275362	-0.0148061	0.00241917	9.33952e-10	T	C	-0.0640053	0.0245	0.266726	0.008915	rs2257213	2	2.18987e-10	-0.0152812	0.00240747	0.161764	-0.033365	0.0238464	3.36011e-10	40.2895	0	6.20479e-10	74.9603	3.99365	0.045672	0.00090723	9.33953e-10	0.00898929	1	0.891
	rs1618851		7	99810643	T	G	0.280505	-0.0147933	0.00240517	7.71848e-10	T	G	-0.0633978	0.0244	0.266739	0.009436	rs1618851	2	1.81976e-10	-0.015261	0.00239357	0.160448	-0.0330305	0.0235333	2.80285e-10	40.6512	0	5.06219e-10	74.5536	3.92983	0.0474367	0.000880627	7.71848e-10	0.00936947	1	0.891
	rs1623264		7	99811204	G	C	0.279042	-0.0148045	0.00240901	7.97289e-10	G	C	-0.0641972	0.0244	0.266739	0.00862	rs1623264	2	1.83876e-10	-0.0152813	0.00239736	0.16173	-0.0335328	0.0239644	2.83152e-10	40.6309	0	5.08159e-10	75.3585	4.0582	0.0439574	0.000919238	7.97289e-10	0.00851258	1	0.893
	rs1727130		7	99811464	C	G	0.280536	-0.0147935	0.00240508	7.70265e-10	C	G	-0.0626949	0.0244	0.266752	0.0103	rs1727130	2	1.8498e-10	-0.0152544	0.00239348	0.159134	-0.0325901	0.0231466	2.84816e-10	40.6192	0	5.24056e-10	73.8011	3.81696	0.0507362	0.0008467	7.70265e-10	0.0101856	1	0.889
	rs1636975		7	99812089	A	G	0.280551	-0.0147992	0.00240504	7.58429e-10	A	G	-0.0707981	0.0251	0.263331	0.004844	rs1636975	2	1.61206e-10	-0.0153086	0.00239407	0.174895	-0.0372251	0.0274391	2.48909e-10	40.888	0	4.59298e-10	79.7252	4.93223	0.0263603	0.00125004	7.58428e-10	0.00479277	1	0.9
	rs1727133		7	99812870	C	T	0.280628	-0.0144952	0.00240487	1.66593e-09	C	T	-0.0626949	0.0244	0.266739	0.0103	rs1727133	2	4.09438e-10	-0.0149589	0.00239327	0.163529	-0.0324791	0.0233109	6.20065e-10	39.0673	0	1.13931e-09	74.1245	3.86466	0.0493133	0.000861035	1.66593e-09	0.0101856	1	0.887
	rs1727134		7	99813672	T	C	0.273976	-0.0149695	0.00242296	6.48488e-10	T	C	-0.0643999	0.0245	0.266739	0.008568	rs1727134	2	1.48537e-10	-0.0154482	0.0024112	0.160137	-0.0336724	0.0239728	2.2973e-10	41.048	0	4.0273e-10	75.1932	4.03116	0.0446673	0.000918624	6.48488e-10	0.00857454	1	0.894
	rs1636978		7	99813912	G	A	0.273961	-0.0149223	0.00242318	7.35911e-10	G	A	-0.0641013	0.0245	0.266739	0.008838	rs1636978	2	1.70521e-10	-0.0153988	0.00241141	0.160269	-0.0334688	0.0238354	2.62992e-10	40.7782	0	4.83316e-10	74.9388	3.99024	0.0457646	0.000906224	7.35911e-10	0.00888677	1	0.892
	rs1727138		7	99815247	T	C	0.280582	-0.0149511	0.00240754	5.2945e-10	T	C	-0.0630996	0.0245	0.266739	0.009854	rs1727138	2	1.25752e-10	-0.0154116	0.002396	0.158002	-0.0328522	0.0232693	1.95147e-10	41.3735	0	3.49359e-10	73.8579	3.82525	0.0504857	0.000856117	5.2945e-10	0.0100097	1	0.89
	rs1727139		7	99815367	C	T	0.280644	-0.014768	0.00240788	8.61338e-10	C	T	-0.0665993	0.0248	0.262312	0.007186	rs1727139	2	1.96564e-10	-0.0152521	0.00239661	0.167896	-0.0348065	0.0252404	3.02277e-10	40.5005	0	5.58857e-10	76.8903	4.32719	0.0375082	0.00103282	8.61338e-10	0.0072431	1	0.894
	rs1727140		7	99815399	T	A	0.28069	-0.0148297	0.00240801	7.34491e-10	T	A	-0.0628972	0.0244	0.266752	0.01	rs1727140	2	1.74941e-10	-0.0152933	0.00239637	0.158985	-0.0327308	0.0232382	2.69668e-10	40.7282	0	4.89772e-10	73.9813	3.84339	0.0499425	0.000854663	7.34491e-10	0.00994447	1	0.89
	rs1727142		7	99816179	T	C	0.271789	-0.0151185	0.00243391	5.24475e-10	T	C	-0.0598031	0.025	0.264774	0.01679	rs1727142	2	1.41598e-10	-0.015538	0.00242245	0.150587	-0.0305336	0.0212413	2.19211e-10	41.1415	0	3.92152e-10	68.4019	3.16475	0.0752439	0.000682897	5.24475e-10	0.0167512	1	0.877
	rs2906645		7	99817859	A	G	0.275516	-0.0151414	0.00242287	4.12106e-10	A	G	-0.0654029	0.0248	0.261312	0.008355	rs2906645	2	9.40704e-11	-0.0156166	0.00241139	0.160688	-0.0342121	0.0243892	1.46834e-10	41.941	0	2.5511e-10	75.4214	4.06857	0.0436882	0.000952654	4.12106e-10	0.00835902	1	0.894
	rs858505		7	99819577	G	A	0.273961	-0.0151421	0.00242722	4.41986e-10	G	A	-0.0625991	0.0245	0.266739	0.01045	rs858505	2	1.04747e-10	-0.0156033	0.0024154	0.154232	-0.0326085	0.0228873	1.63148e-10	41.7308	0	2.86879e-10	73.0863	3.71558	0.0539068	0.000823014	4.41986e-10	0.0106168	1	0.89
	rs858506		7	99820050	T	C	0.27547	-0.014805	0.00242309	9.96666e-10	T	C	-0.0618967	0.0245	0.266739	0.0114	rs858506	2	2.46867e-10	-0.0152611	0.00241133	0.157825	-0.03204	0.0226844	3.77851e-10	40.0554	0	7.09948e-10	72.6681	3.65873	0.0557763	0.000805755	9.96667e-10	0.011524	1	0.886
	rs858507		7	99820877	A	G	0.27393	-0.0150636	0.00242747	5.45251e-10	A	G	-0.0643999	0.0246	0.266765	0.008695	rs858507	2	1.25457e-10	-0.0155394	0.00241573	0.159195	-0.0336585	0.0239088	1.94698e-10	41.3781	0	3.56577e-10	74.8958	3.9834	0.0459507	0.000911507	5.45252e-10	0.00884774	1	0.893
	rs858508		7	99821381	C	G	0.27547	-0.0152977	0.00242312	2.7325e-10	C	G	-0.0618009	0.0245	0.266739	0.01153	rs858508	2	6.53938e-11	-0.0157482	0.00241135	0.150301	-0.0321586	0.0223561	1.02809e-10	42.6521	0	1.80159e-10	71.9719	3.56784	0.0589088	0.000778212	2.7325e-10	0.0116529	1	0.89
	rs863450		7	99821685	C	T	0.275454	-0.0151167	0.00242325	4.42668e-10	C	T	-0.0625033	0.0244	0.265752	0.01062	rs863450	2	1.04146e-10	-0.0155795	0.00241139	0.154015	-0.03259	0.0228623	1.6223e-10	41.742	0	2.94047e-10	73.2249	3.73481	0.0532897	0.000822129	4.42667e-10	0.0104188	1	0.891
	rs858511		7	99823621	A	G	0.275377	-0.0152199	0.0024239	3.40613e-10	A	G	-0.062301	0.0245	0.266739	0.01098	rs858511	2	8.08994e-11	-0.0156762	0.00241213	0.15249	-0.0324482	0.0226785	1.26654e-10	42.2359	0	2.23812e-10	72.6556	3.65706	0.0558322	0.000805254	3.40613e-10	0.0109937	1	0.89
	rs858512		7	99824453	A	G	0.275362	-0.0150868	0.00242368	4.82396e-10	A	G	-0.0622052	0.0245	0.266739	0.01104	rs858512	2	1.16027e-10	-0.0155434	0.00241191	0.154255	-0.0323387	0.0226992	1.80347e-10	41.5308	0	3.22442e-10	72.6989	3.66286	0.0556381	0.000807012	4.82396e-10	0.0111174	1	0.889
	rs858513		7	99825558	G	A	0.275362	-0.0152392	0.00242368	3.22319e-10	G	A	-0.0622052	0.0245	0.266739	0.01101	rs858513	2	7.66393e-11	-0.0156944	0.00241191	0.152009	-0.0323945	0.0226144	1.20113e-10	42.3417	0	2.12553e-10	72.5214	3.63919	0.0564343	0.000799839	3.22319e-10	0.0111174	1	0.89
	rs858514		7	99825748	A	G	0.273807	-0.0152341	0.00242794	3.50824e-10	A	G	-0.0628972	0.0245	0.266739	0.01013	rs858514	2	8.19057e-11	-0.0156976	0.00241611	0.153486	-0.0328307	0.0230015	1.28198e-10	42.2118	0	2.32114e-10	73.3184	3.74791	0.0528737	0.000832815	3.50824e-10	0.0102514	1	0.892
	rs2950520		7	99827148	T	C	0.273714	-0.0150006	0.00242906	6.59627e-10	T	C	-0.0613968	0.0245	0.266739	0.01212	rs2950520	2	1.63093e-10	-0.0154523	0.00241721	0.153881	-0.0317936	0.0222963	2.51764e-10	40.8653	0	4.51149e-10	71.8411	3.55127	0.0594998	0.000773227	6.59627e-10	0.0122108	1	0.886
	rs866500		7	99840461	A	G	0.24709	-0.0162059	0.00250761	1.02858e-10	A	G	-0.0570996	0.0263	0.241252	0.03023	rs866500	2	3.1457e-11	-0.0165743	0.00249629	0.129544	-0.0282725	0.0186506	5.01597e-11	44.0841	0	8.51229e-11	58.2623	2.39591	0.121653	0.000487158	1.02858e-10	0.0299246	1	0.864
	rs6464547		7	143083661	A	C	0.340206	0.0130645	0.00227603	9.46513e-09	A	C	0.0684994	0.0223	0.371922	0.002139	rs6464547	2	1.71986e-09	0.0136361	0.00226427	0.184062	0.0363433	0.0273597	2.52399e-09	36.2678	0	4.76044e-09	83.649	6.11583	0.0133976	0.00128528	9.46514e-09	0.00212828	1	0.913
	rs6464548		7	143083839	T	C	0.340206	0.0131277	0.00227668	8.11011e-09	T	C	0.0693955	0.0223	0.371935	0.001877	rs6464548	2	1.42706e-09	0.0137081	0.0022649	0.184405	0.0368887	0.027792	2.10312e-09	36.6315	0	3.96042e-09	84.1294	6.30097	0.0120672	0.0013318	8.11011e-09	0.00185884	1	0.915
	rs1131885		7	143088526	C	T	0.338713	0.0136512	0.00229096	2.54228e-09	T	C	-0.0630996	0.0228	0.628151	0.005723	rs1131885	2	5.45058e-10	0.0141454	0.00227948	0.169932	0.0331721	0.0241705	8.20428e-10	38.5089	0	1.49127e-09	78.5253	4.65664	0.0309337	0.000960029	2.54228e-09	0.00564835	1	0.899
	rs3812406		7	143089159	T	C	0.341069	0.0134098	0.00228989	4.73823e-09	C	T	-0.0610034	0.0228	0.625176	0.007488	rs3812406	2	1.10004e-09	0.0138851	0.00227842	0.169997	0.0318005	0.0231746	1.63062e-09	37.139	0	3.04349e-09	76.819	4.31388	0.0378026	0.000870032	4.73824e-09	0.00745983	1	0.892
	rs6509172		19	45325391	T	C	0.388312	-0.0166496	0.00222491	7.24998e-14	T	C	-0.0501045	0.0251	0.375919	0.04546	rs6509172	2	2.34225e-14	-0.0169104	0.00221622	0.083244	-0.0240352	0.0138758	4.21421e-14	58.2213	0	6.52982e-14	43.2682	1.76268	0.184291	0.000242136	7.24997e-14	0.0459127	1	0.858
	rs1871045		19	45326768	T	C	0.381306	-0.016094	0.00222008	4.1897e-13	T	C	-0.0497997	0.0251	0.370939	0.04692	rs1871045	2	1.40452e-13	-0.0163557	0.00221145	0.0925109	-0.0236742	0.0140725	2.4589e-13	54.6994	0	3.94715e-13	44.1111	1.78926	0.181016	0.000250567	4.1897e-13	0.0472501	1	0.854
	rs61062133		19	45463256	G	C	0.0438251	0.0526036	0.00527059	1.85358e-23	G	C	0.0988041	0.0498	0.0414835	0.04747	rs61062133	2	3.90454e-24	0.0531154	0.00524132	3.90454e-24	0.0531154	0.00524132	9.05636e-24	102.697	0	1.11788e-23	0	0.851132	0.356232	0	1.85358e-23	0.0472538	1	0.903
	rs16979586		19	45471742	G	A	0.0438097	0.0525528	0.00527152	2.07922e-23	G	A	0.101898	0.0491	0.04149	0.03814	rs16979586	2	3.91297e-24	0.0531151	0.0052414	3.91297e-24	0.0531151	0.0052414	9.07574e-24	102.693	0	1.11449e-23	0	0.998504	0.317673	0	2.07922e-23	0.0379573	1	0.912
	rs112329279		19	45488093	T	C	0.0431783	0.0527742	0.00531033	2.84413e-23	T	C	0.0976982	0.0492	0.0415952	0.04714	rs112329279	2	5.889e-24	0.0532915	0.00527967	5.889e-24	0.0532915	0.00527967	1.36098e-23	101.883	0	1.58078e-23	0	0.824132	0.363975	0	2.84414e-23	0.0470627	1	0.904
	rs7257610		19	45490428	A	G	0.0437635	0.0526662	0.00527443	1.76939e-23	A	G	0.0970995	0.0492	0.0414939	0.04846	rs7257610	2	3.72082e-24	0.0531711	0.00524438	3.72082e-24	0.0531711	0.00524438	8.63387e-24	102.793	0	1.0294e-23	0	0.80635	0.369202	0	1.76939e-23	0.048431	1	0.903
	rs60461903		19	45497577	C	T	0.0436249	0.0524826	0.00528355	2.98494e-23	C	T	0.0998001	0.0493	0.0414952	0.04302	rs60461903	2	5.97123e-24	0.0530199	0.00525347	5.97123e-24	0.0530199	0.00525347	1.37981e-23	101.856	0	1.68565e-23	0	0.91073	0.339921	0	2.98493e-23	0.0429349	1	0.907
	rs73560223		19	45498622	G	A	0.0433169	0.0526923	0.00530172	2.82437e-23	G	A	0.103098	0.0494	0.0414926	0.03685	rs73560223	2	5.26706e-24	0.0532662	0.00527145	9.11339e-12	0.0539668	0.00791319	1.21845e-23	102.104	0	1.47203e-23	2.84443	1.02928	0.310329	3.61348e-05	2.82438e-23	0.0368878	1	0.913
	rs148851376		19	45500494	T	C	0.0425316	0.0532363	0.00534822	2.42191e-23	T	C	0.101401	0.0496	0.0414913	0.04084	rs148851376	2	4.70042e-24	0.0537899	0.0053174	4.70042e-24	0.0537899	0.0053174	1.08846e-23	102.33	1.11022e-16	1.30624e-23	0	0.932124	0.334312	0	2.42191e-23	0.0409165	1	0.91
	rs28725459		16	31132662	A	G	0.297598	-0.0129917	0.00236155	3.76882e-08	G	A	-0.0846977	0.0235	0.718749	0.0003082	rs28725459	2	3.16387e-07	-0.0120151	0.00234971	0.497867	0.033055	0.0487645	8.97068e-09	26.147	7.59248	1.04866e-07	94.1547	17.1079	3.53159e-05	0.0044927	3.76882e-08	0.000313167	0.999	0.204
	rs1060506		16	31133449	T	C	0.297505	-0.0129681	0.00236173	3.99817e-08	C	T	-0.0847957	0.0235	0.719737	0.0003065	rs1060506	2	3.35028e-07	-0.0119906	0.00234989	0.497379	0.0331179	0.0488019	9.37276e-09	26.0365	7.61561	1.08213e-07	94.1636	17.1339	3.4835e-05	0.00449997	3.99817e-08	0.000308177	0.999	0.204
	rs11865499		16	31132250	G	A	0.298583	-0.0129734	0.00235932	3.82409e-08	A	G	-0.0851005	0.0235	0.718749	0.0002898	rs11865499	2	3.22949e-07	-0.0119947	0.00234752	0.496695	0.0332765	0.0489577	8.62685e-09	26.1074	7.71003	1.04292e-07	94.2006	17.2431	3.28889e-05	0.00453033	3.82409e-08	0.000293129	0.999	0.203

## Sheet: ST-6
	Supplementary Table 6: MG loci with cross-trait associations in AD
	Independent SNPs	Genomic locus	Lead SNPs		CHR	BP	EA	NEA	EAF	BETA	SE	P-AD	EA	NEA	BETA	SE	EAF	P-MG	SNP	#STUDY	PVALUE_FE	BETA_FE	STD_FE	PVALUE_RE	BETA_RE	STD_RE	PVALUE_RE2	STAT1_RE2	STAT2_RE2	PVALUE_BE	I_SQUARE	Q	PVALUE_Q	TAU_SQUARE	PVAL_AD	PVAL_MG	M_val_AD	M_val_MG
	rs9271163	1	rs9271163	#	6	32577733	C	T	0.300308	0.0129687	0.00235266	3.54054e-08	C	T	0.146599	0.0242	0.317583	1.419e-09	rs9271163	2	1.25812e-09	0.0142199	0.00234162	0.245144	0.0776133	0.0667799	1.06966e-13	36.8771	19.4842	1.8421e-10	96.6894	30.206	3.885e-08	0.00863294	3.54054e-08	1.37987e-09	0.22	0.996
	rs9271548	1		#	6	32590234	A	T	0.36757	0.0122148	0.00223687	4.74364e-08	A	T	0.135998	0.0228	0.405544	2.582e-09	rs9271548	2	1.77709e-09	0.0133949	0.00222618	0.244256	0.0720268	0.0618567	2.38254e-13	36.204	18.5584	4.53687e-10	96.5746	29.194	6.54819e-08	0.00739872	4.74364e-08	2.44897e-09	0.256	0.995
	rs9271414	1			6	32587782	C	T	0.368248	0.0121101	0.00223569	6.07027e-08	C	T	0.135998	0.0228	0.405531	2.397e-09	rs9271414	2	2.32983e-09	0.01329	0.00222502	0.244987	0.0719762	0.0619091	3.03373e-13	35.6763	18.6036	3.24546e-10	96.5805	29.2437	6.38239e-08	0.00741168	6.07028e-08	2.44897e-09	0.209	0.996
	rs9270979	1			6	32573780	A	G	0.279289	0.0129115	0.00240362	7.80012e-08	A	G	0.143996	0.0243	0.317544	2.93e-09	rs9270979	2	3.04967e-09	0.0141816	0.00239195	0.244569	0.0762235	0.0655043	4.77051e-13	35.1519	18.2243	4.00174e-10	96.5299	28.8178	7.95152e-08	0.00829344	7.80012e-08	3.10854e-09	0.21	0.996
	rs9271092	1			6	32576296	A	G	0.279396	0.0132396	0.00240348	3.61855e-08	A	G	0.149402	0.0247	0.317534	1.381e-09	rs9271092	2	1.2916e-09	0.0145168	0.00239218	0.245036	0.0791017	0.068045	1.14989e-13	36.8259	19.391	1.99489e-10	96.6782	30.1042	4.09438e-08	0.00896216	3.61855e-08	1.46052e-09	0.227	0.996
	rs9271090	1			6	32576247	T	C	0.279366	0.0132335	0.00240356	3.67507e-08	T	C	0.149299	0.0247	0.317534	1.385e-09	rs9271090	2	1.31678e-09	0.0145099	0.00239226	0.245034	0.0790456	0.0679965	1.19544e-13	36.7883	19.3511	2.10607e-10	96.6735	30.0614	4.18584e-08	0.00894898	3.67507e-08	1.4988e-09	0.229	0.996
	rs9271194	1			6	32578612	T	G	0.280767	0.0132206	0.00240005	3.61917e-08	T	G	0.148196	0.0245	0.317496	1.453e-09	rs9271194	2	1.26345e-09	0.0145036	0.00238861	0.24447	0.0785061	0.0674517	1.13991e-13	36.8689	19.3654	2.07787e-10	96.6736	30.0628	4.18285e-08	0.00880617	3.61917e-08	1.45914e-09	0.231	0.996
	rs9271170	1			6	32577889	T	C	0.280798	0.0130486	0.00239979	5.40593e-08	T	C	0.144499	0.0242	0.317544	2.353e-09	rs9271170	2	1.97195e-09	0.0143287	0.00238807	0.243764	0.0765681	0.0656882	2.58114e-13	36.0012	18.6013	3.59077e-10	96.5774	29.2175	6.46923e-08	0.0083439	5.40593e-08	2.35756e-09	0.237	0.995
	rs9270908	1			6	32572148	G	A	0.345827	0.0123932	0.00226715	4.59199e-08	G	A	0.148403	0.025	0.31866	2.956e-09	rs9270908	2	2.22852e-09	0.0135026	0.00225788	0.250401	0.0781194	0.0679667	2.97633e-13	35.7629	18.5552	6.38832e-10	96.5936	29.3564	6.02159e-08	0.00893426	4.59199e-08	2.91846e-09	0.241	0.994
	rs9270999	1			6	32574438	G	A	0.280628	0.0129901	0.00240017	6.22675e-08	G	A	0.143996	0.0243	0.317544	2.975e-09	rs9270999	2	2.39558e-09	0.0142559	0.00238855	0.244052	0.0762614	0.0654649	3.83468e-13	35.6221	18.1901	5.70507e-10	96.5259	28.7841	8.09127e-08	0.00828315	6.22675e-08	3.10854e-09	0.251	0.995
	rs9271146	1			6	32577282	A	C	0.271035	0.0130816	0.00242707	7.05148e-08	A	C	0.1441	0.0244	0.315413	3.699e-09	rs9271146	2	2.71528e-09	0.0143652	0.00241515	0.243599	0.0763412	0.0654706	4.79871e-13	35.3781	17.9863	6.5124e-10	96.4974	28.5502	9.13e-08	0.00828229	7.05148e-08	3.51072e-09	0.252	0.995
	rs9271076	1			6	32575873	G	A	0.279735	0.0131166	0.0024027	4.78563e-08	G	A	0.144204	0.0241	0.317504	2.23e-09	rs9271076	2	1.68309e-09	0.0144067	0.00239084	0.243086	0.0764669	0.065507	2.12176e-13	36.3099	18.6839	3.6663e-10	96.5864	29.295	6.21574e-08	0.00829867	4.78563e-08	2.18301e-09	0.253	0.995
	rs9271247	1			6	32580112	A	G	0.278226	0.0131287	0.00240659	4.88869e-08	A	G	0.143399	0.0241	0.317491	2.599e-09	rs9271247	2	1.74903e-09	0.0144149	0.00239468	0.242666	0.0760568	0.0650977	2.60752e-13	36.235	18.3472	5.44346e-10	96.5434	28.9299	7.50445e-08	0.00819187	4.88869e-08	2.67871e-09	0.284	0.994
	rs9271172	1			6	32577975	C	T	0.279412	0.0131085	0.00240349	4.92653e-08	C	T	0.143104	0.0241	0.317491	2.847e-09	rs9271172	2	1.78464e-09	0.0143887	0.00239163	0.242676	0.0758945	0.0649601	2.81742e-13	36.1957	18.2319	6.26261e-10	96.5288	28.8087	7.98897e-08	0.00815612	4.92653e-08	2.88651e-09	0.295	0.994
	rs3997871	1			6	32580456	G	A	0.282661	0.0132113	0.00239531	3.47769e-08	G	A	0.144499	0.0241	0.317504	2.03e-09	rs3997871	2	1.19084e-09	0.0144956	0.00238356	0.242587	0.076665	0.0656073	1.45482e-13	36.9843	18.763	4.51484e-10	96.5971	29.3863	5.92958e-08	0.00832495	3.47769e-08	2.02475e-09	0.305	0.994
	rs9271173	1			6	32577981	A	G	0.279165	0.0131127	0.00240414	4.91977e-08	A	G	0.1432	0.0242	0.317531	3.166e-09	rs9271173	2	1.82743e-09	0.014384	0.00239237	0.242799	0.0759276	0.0650055	3.16961e-13	36.1495	18.0429	7.81484e-10	96.5052	28.6137	8.83543e-08	0.00816565	4.91977e-08	3.27159e-09	0.315	0.994
	rs9271073	1			6	32575803	G	T	0.279181	0.0132212	0.00240409	3.8092e-08	G	T	0.143901	0.0241	0.317504	2.4e-09	rs9271073	2	1.31945e-09	0.0145088	0.00239222	0.242268	0.076361	0.0653028	1.82041e-13	36.7843	18.5153	5.24926e-10	96.5651	29.1127	6.82883e-08	0.00824531	3.8092e-08	2.3581e-09	0.316	0.994
	rs9271174	1			6	32578040	C	G	0.278519	0.0131879	0.00240578	4.21124e-08	C	G	0.143399	0.0241	0.317491	2.587e-09	rs9271174	2	1.48778e-09	0.0144727	0.00239388	0.242275	0.0760854	0.0650681	2.25459e-13	36.5503	18.3223	6.38505e-10	96.5403	28.9038	7.60618e-08	0.00818417	4.21124e-08	2.67871e-09	0.317	0.994
	rs9271193	1			6	32578566	T	C	0.278534	0.0132337	0.00240591	3.78697e-08	T	C	0.143901	0.0241	0.317504	2.305e-09	rs9271193	2	1.30777e-09	0.0145231	0.00239401	0.242186	0.076367	0.0652966	1.80838e-13	36.8017	18.5112	5.39482e-10	96.5644	29.1067	6.84998e-08	0.00824367	3.78698e-08	2.3581e-09	0.318	0.994
	rs9271242	1			6	32579940	T	C	0.277841	0.0131726	0.0024077	4.47361e-08	T	C	0.143503	0.0242	0.317531	3.036e-09	rs9271242	2	1.62694e-09	0.0144501	0.00239587	0.24253	0.0761133	0.0651272	2.68926e-13	36.376	18.1446	7.69428e-10	96.5181	28.7199	8.36406e-08	0.00819728	4.47361e-08	3.03163e-09	0.324	0.994
	rs9271202	1			6	32578837	A	C	0.278164	0.013235	0.00240685	3.82156e-08	A	C	0.1432	0.0241	0.317491	2.711e-09	rs9271202	2	1.34303e-09	0.0145185	0.00239494	0.241878	0.0760053	0.0649448	2.14598e-13	36.7498	18.2213	7.2578e-10	96.5271	28.7944	8.04827e-08	0.00815214	3.82156e-08	2.81722e-09	0.35	0.993
	rs9271201	1			6	32578818	C	A	0.278241	0.0132416	0.00240665	3.75343e-08	C	A	0.1432	0.0241	0.317491	2.715e-09	rs9271201	2	1.31729e-09	0.0145247	0.00239474	0.241835	0.0760085	0.0649415	2.10876e-13	36.7876	18.2185	7.06345e-10	96.5268	28.7916	8.06009e-08	0.0081513	3.75343e-08	2.81722e-09	0.355	0.993
	rs9271246	1			6	32580084	A	G	0.277995	0.0132597	0.00240719	3.62212e-08	A	G	0.143303	0.0241	0.317491	2.637e-09	rs9271246	2	1.26279e-09	0.0145442	0.00239527	0.241759	0.0760705	0.0649841	1.98803e-13	36.8699	18.2539	6.88569e-10	96.5313	28.8291	7.9055e-08	0.00816233	3.62211e-08	2.74468e-09	0.358	0.993
	rs9271078	1			6	32575930	C	T	0.279597	0.0133002	0.00240296	3.11362e-08	C	T	0.143996	0.0241	0.317504	2.307e-09	rs9271078	2	1.05788e-09	0.0145867	0.0023911	0.241789	0.0764482	0.0653109	1.46273e-13	37.2152	18.5213	5.62679e-10	96.5659	29.1201	6.80272e-08	0.00824741	3.11363e-08	2.30178e-09	0.359	0.993
	rs9271192	1			6	32578530	C	A	0.278195	0.0132777	0.00240674	3.45077e-08	C	A	0.143503	0.0241	0.317491	2.541e-09	rs9271192	2	1.19234e-09	0.0145636	0.00239482	0.241726	0.0761826	0.0650752	1.81049e-13	36.9818	18.3287	6.57921e-10	96.541	28.9099	7.5823e-08	0.00818602	3.45077e-08	2.60898e-09	0.36	0.993
	rs9271252	1			6	32580288	C	G	0.278919	0.0132646	0.00240469	3.46549e-08	C	G	0.1432	0.0241	0.317491	2.75e-09	rs9271252	2	1.21067e-09	0.0145455	0.00239281	0.241682	0.0760195	0.06493	1.95232e-13	36.9521	18.2079	7.42174e-10	96.5256	28.7818	8.1007e-08	0.00814831	3.46549e-08	2.81722e-09	0.373	0.993
	rs3997874	1			6	32580741	A	G	0.277441	0.0133186	0.0024087	3.21406e-08	A	G	0.143503	0.0241	0.317491	2.551e-09	rs3997874	2	1.10039e-09	0.0146062	0.00239676	0.241455	0.0762024	0.0650547	1.68726e-13	37.1383	18.313	6.79696e-10	96.5388	28.8913	7.65556e-08	0.00818069	3.21406e-08	2.60898e-09	0.378	0.993
	rs9271198	1			6	32578726	G	A	0.278673	0.0132943	0.0024055	3.26439e-08	G	A	0.1432	0.0241	0.317491	2.734e-09	rs9271198	2	1.13297e-09	0.0145757	0.0023936	0.241486	0.0760339	0.0649151	1.8407e-13	37.0814	18.1961	7.38044e-10	96.524	28.7685	8.15673e-08	0.00814445	3.26439e-08	2.81722e-09	0.389	0.993
	rs9271200	1			6	32578756	C	T	0.280012	0.0132687	0.00240197	3.31194e-08	C	T	0.143	0.0241	0.317491	2.943e-09	rs9271200	2	1.16254e-09	0.0145447	0.00239013	0.241569	0.0759181	0.0648278	1.95878e-13	37.0312	18.1222	8.24594e-10	96.5147	28.6921	8.48486e-08	0.00812181	3.31194e-08	2.96345e-09	0.394	0.993
	rs9271205	1			6	32578941	G	A	0.278103	0.0132478	0.00240695	3.71364e-08	G	A	0.142801	0.0242	0.317531	3.536e-09	rs9271205	2	1.35315e-09	0.0145168	0.00239513	0.241733	0.0757865	0.064738	2.63429e-13	36.7352	17.8266	9.82267e-10	96.4762	28.3786	9.97627e-08	0.00809631	3.71363e-08	3.61595e-09	0.405	0.992
	rs9271260	1			6	32580507	A	C	0.277626	0.0133291	0.00240822	3.11544e-08	A	C	0.142497	0.0241	0.317491	3.247e-09	rs9271260	2	1.09229e-09	0.0146061	0.00239629	0.24095	0.0756872	0.0645456	2.06551e-13	37.1527	17.8947	9.18731e-10	96.4841	28.442	9.65479e-08	0.00804887	3.11544e-08	3.36466e-09	0.439	0.992

## Sheet: ST-7
		Supplementary Table 7: MR results and sensitivity testing of AD with MG
	A: Results of bidirectional causal relationship assessment between AD and MG
	Exposure	Outcome	Method	nIVs	OR (95%CI)	P
	AD (Jansen et al)	MG	IVW	28	0.83 (0.59 – 1.16)	0.28
			Weighted median	28	0.83 (0.51 – 1.36)	0.46
			MR Egger	28	0.86 (0.54 – 1.38)	0.54
			MR-PRESSO (Raw)	28	0.83 (0.60 – 1.14)	0.25
			MR-PRESSO (Corrected)	28	-	-
	AD (Lambert et al)	MG	IVW	11	1.02 (0.96 – 1.06)	0.85
			Weighted median	11	1.00 (0.95 – 1.05)	0.97
			MR Egger	11	1.00 (0.94 – 1.07)	0.98
			MR-PRESSO (Raw)	11	1.00 (0.96 – 1.05)	0.83
			MR-PRESSO (Corrected)	11	-	-
	MG	AD (Jansen et al)	IVW	9	1.013 (1.004 – 1.021)	2.67 × 10-3
			Weighted median	9	1.012 (1.001 – 1.023)	1.44 × 10-2
			MR Egger	9	1.020 (1.002 – 1.039)	0.069
			MR-PRESSO (Raw)	9	1.013 (1.007 – 1.018)	1.50 × 10-3
			MR-PRESSO (Corrected)	9	-	-
	MG	AD-Lambert	IVW	7	1.04 (0.95 – 1.15)	0.37
			Weighted median	7	1.03 (0.94 – 1.14)	0.5
			MR Egger	7	1.18 (0.91 – 1.53)	0.28
			MR-PRESSO (Raw)	7	1.04 (0.95 – 1.15)	0.4
			MR-PRESSO (Corrected)	7	-	-
	MG*	AD (Jansen et al)	IVW	18	1.01 (1.00 – 1.01)	0.1
			Weighted median	18	1.01 (1.00 – 1.02)	0.049
			MR Egger	18	1.02 (1.00 - 1.03)	0.096
			MR-PRESSO (Raw)	18	1.01 (1.00 – 1.01)	0.12
			MR-PRESSO (Corrected)	18	-	-
	MG*	AD-Lambert	IVW	17	1.02 (0.96 – 1.09)	0.46
			Weighted median	17	1.03 (0.95 – 1.11)	0.48
			MR Egger	17	1.13 (0.94 – 1.37	0.2
			MR-PRESSO (Raw)	17	1.02 (0.97 – 1.08)	0.45
			MR-PRESSO (Corrected)	17	-	-
	GSMR results
	Exposure	Outcome	OR (95%CI)	P	No SNPs	HEIDI test P
	MG	AD (Jansen et al)	1.011 (1.003 – 1.019)	0.01	10	0.977659
	AD (Jansen et al)	MG	1.072 (0.834 – 1.377)	0.59	42	0.651574
	MG*	AD (Jansen et al)	1.008 (1.002 – 1.014)	0.014	22	0.817081
	AD (Jansen et al)*	MG	1.065 (0.836 – 1.359)	0.61	56	0.358819
	AD: Alzheimer’s disease; MG: Myasthenia gravis; CI: Confidence interval; IVs: Instrumental variables; IVW: Inverse variance weighted; MR: Mendelian randomisation; MR-PRESSO: Mendelian randomisation pleiotropy residual sum and outlier; P: P-value; OR: Odds ratio. *IVs selected at a genome-wide suggestive significance level (P < 1×10⁻⁶).
	B: Sensitivity results
	Exposure	Outcome	Heterogeneity tests		Horizontal pleiotropy tests			MR PRESSO Global Test P
			Method	Cochran's Q P value	Method	Intercept	P value
	AD (Jansen et al)	MG	IVW	0.65	Egger intercept	-0.00186	0.81	0.71
	AD (Lambert et al)	MG	IVW	0.69	Egger intercept	0.00196	0.86	0.78
	MG	AD (Jansen et al)	IVW	0.92	Egger intercept	-0.00192	0.41	0.92
	MG	AD (Lambert et al)	IVW	0.22	Egger intercept	-0.0241	0.38	0.36
	MG*	AD (Jansen et al)	IVW	0.47	Egger intercept	-0.00197	0.25	0.5
	MG*	AD (Lambert et al)	IVW	0.55	Egger intercept	-0.0174	0.26	0.59
	AD: Alzheimer’s disease; MG: Myasthenia gravis; CI: Confidence interval; IVs: Instrumental variables; IVW: Inverse variance weighted; MR: Mendelian randomisation; MR-PRESSO: Mendelian randomisation pleiotropy residual sum and outlier; P: P-value; OR: Odds ratio. *IVs selected at a genome-wide suggestive significance level (P < 1×10⁻⁶)

## Sheet: ST-8
	Supplementary Table 8: Shared loci and variants for AD and MG in colocalisation analysis
	id	chr	pos	logBF_1	logBF_2	logBF_3	Z_ADjan	V_ADjan	Z_mg	V_mg	pi_1	pi_2	pi_3	PPA_1	PPA_2	PPA_3	chunk
	rs140341491	chr3	30573201	1.06187	6.22616	7.01194	-2.40755	0.002972	-4.16251	0.011342	-8.57942	-8.57942	-8.57942	0.0068307	0.185498	0.812083	298
	rs3752241	chr19	1053524	15.4127	1.43973	17.2366	-6.27876	8e-06	2.6812	0.000906	-8.41028	-8.41028	-8.41028	0.119994	0.000267569	0.779068	1579
	rs74508071	chr8	122961863	4.99346	2.37593	7.37774	-3.81697	0.002318	2.95467	0.016358	-9.06346	-9.06346	-9.06346	0.17641	0.00265595	0.772405	921
	rs141872738	chr7	37836588	7.3061	-0.479626	7.12064	4.46189	0.000337	1.36083	0.005112	-8.4797	-8.4797	-8.4797	0.547074	0.000304658	0.757586	770
	rs62038901	chr16	12233364	5.72518	0.498481	6.52726	-4.35431	2.4e-05	2.11314	0.003204	-8.17583	-8.17583	-8.17583	0.521703	0.000729701	0.75343	1440
	rs12901830	chr15	79239449	4.18473	8.10522	12.5283	-4.13357	7e-06	-4.60452	0.000906	-8.79845	-8.79845	-8.79845	0.036126	0.397069	0.749599	1415
	rs951977	chr12	124877620	7.09269	0.26054	7.61874	-4.56144	6.2e-05	1.92759	0.004956	-8.78539	-8.78539	-8.78539	0.544192	0.000362099	0.74354	1253
	rs182738202	chr9	3167892	5.52945	0.674108	6.25305	-3.96829	0.002907	2.13011	0.010445	-8.45702	-8.45702	-8.45702	0.455222	0.00122195	0.740534	938
	rs35803661	chr8	31540437	-1.02081	6.57971	5.04357	1.99647	0.000106	4.24762	0.007056	-7.12448	-7.12448	-7.12448	0.00498934	0.592248	0.733944	871
	rs959729	chr14	61934200	-2.51552	11.2566	8.56606	-1.63811	1.9e-05	5.27852	0.001918	-8.70334	-8.70334	-8.70334	0.000129923	0.697809	0.72702	1350
	rs116925044	chr8	112528131	5.46179	0.250739	5.8934	4.13392	0.000101	-1.86083	0.009139	-7.72489	-7.72489	-7.72489	0.584046	0.0013414	0.718736	917
	rs2476601	chr1	114377568	-2.06727	64.2087	61.4512	1.95357	1.5e-05	11.6368	0.001056	-8.13886	-8.13886	-8.13886	0.000455391	0.658897	0.710494	69
	rs4575098	chr1	161155392	15.921	-2.10637	14.264	6.36951	7e-06	-0.219803	0.000625	-8.74957	-8.74957	-8.74957	0.716495	3.92982e-05	0.708659	80
	rs3859570	chr19	18510925	8.45973	-1.90179	7.00032	4.92521	2.9e-05	-0.582131	0.000718	-8.05611	-8.05611	-8.05611	0.831929	8.13169e-05	0.707675	1592
	rs76953845	chr11	5357211	8.36119	0.92453	9.57273	4.89559	3.2e-05	-2.34402	0.002862	-8.74305	-8.74305	-8.74305	0.737817	0.000856802	0.70038	1098
	rs9401134	chr6	98199541	6.94951	-1.10986	6.26382	4.67645	1.5e-05	-1.16418	0.001475	-8.7294	-8.7294	-8.7294	0.772209	0.000130554	0.699907	697
	rs77002349	chr1	95757380	5.68602	1.12065	6.79029	4.19352	9.6e-05	2.38098	0.0113	-8.30251	-8.30251	-8.30251	0.458783	0.00131286	0.697361	57
	rs16946801	chr15	63605080	6.91176	5.31394	12.6039	-4.78293	5e-06	-3.95381	0.000471	-8.41804	-8.41804	-8.41804	0.007444	0.0702128	0.685827	1407
	rs142783165	chr4	165553089	4.81071	1.26427	6.12202	-3.76567	0.002779	-2.44558	0.01974	-8.37793	-8.37793	-8.37793	0.276349	0.00231302	0.680756	504
	rs35442051	chr12	77127242	-1.73659	7.67218	6.11651	-2.1681	1.2e-05	-4.50294	0.001183	-8.68203	-8.68203	-8.68203	0.000608761	0.414209	0.675303	1225
	rs61931876	chr12	38844123	6.67594	-0.768715	6.1353	-4.2686	0.000857	0.89949	0.0075	-8.25427	-8.25427	-8.25427	0.764545	0.000287427	0.672583	1202
	rs10981525	chr9	115606214	5.35185	-0.437897	5.18296	-4.15192	6.7e-05	-1.12657	0.014811	-7.6324	-7.6324	-7.6324	0.695707	0.000567991	0.670256	992
	rs115341221	chr2	184405092	5.92636	-1.2669	5.07477	-4.34169	4.1e-05	0.157131	0.004212	-7.81682	-7.81682	-7.81682	0.714387	0.000331012	0.660078	243
	rs7705526	chr5	1285974	-0.277784	5.94919	5.99054	-2.57874	3.2e-05	-4.09169	0.000745	-8.34593	-8.34593	-8.34593	0.00255392	0.148977	0.656938	522
	rs117123329	chr16	6885056	6.87261	-0.989036	6.23122	4.37333	0.000286	0.749289	0.005041	-8.48632	-8.48632	-8.48632	0.781684	0.000129672	0.654925	1434
	rs13217620	chr6	27653120	-3.0029	46.382	42.6729	1.32713	1.8e-05	9.97251	0.001592	-7.87778	-7.87778	-7.87778	0.000247065	0.522776	0.644444	651
	rs114856296	chr4	7498401	5.90697	-0.437639	5.79447	4.27214	7.5e-05	1.37103	0.005776	-8.0734	-8.0734	-8.0734	0.552387	0.000562562	0.625865	406
	rs35789010	chr6	25514179	-3.70854	19.1655	14.9896	0.440567	2.1e-05	6.64901	0.001901	-7.99497	-7.99497	-7.99497	0.000125458	0.773612	0.61915	649
	rs1790974	chr18	67511645	-2.04992	10.2742	8.49668	2.22413	5e-06	5.07544	0.000635	-8.31115	-8.31115	-8.31115	0.000561663	0.274359	0.608384	1569
	rs74418912	chr1	238692428	-0.746763	6.55132	5.22627	-1.31354	0.002506	-4.25518	0.01486	-8.29879	-8.29879	-8.29879	0.00228713	0.322947	0.602214	125
	rs35535831	chr5	74324451	2.84094	4.66197	7.6537	3.6364	2.3e-05	3.72133	0.00198	-8.5033	-8.5033	-8.5033	0.0260357	0.0336212	0.60154	564
	rs72763415	chr15	94310692	5.57531	0.31317	6.09807	4.1978	7.2e-05	1.92658	0.007123	-8.33974	-8.33974	-8.33974	0.462234	0.000635933	0.592823	1422
	rs141071274	chr6	166868610	7.30197	-0.110581	7.22335	-4.41911	0.002133	-1.51946	0.01334	-8.48426	-8.48426	-8.48426	0.62245	0.000373295	0.588795	738
	rs72807345	chr5	179244672	5.96306	3.20962	8.97437	4.27721	8.1e-05	-3.26383	0.007276	-7.91316	-7.91316	-7.91316	0.182549	0.0213846	0.585281	628
	rs10933431	chr2	233981912	14.488	-1.97808	12.958	-6.15261	6e-06	-0.037563	0.000858	-8.36846	-8.36846	-8.36846	0.559996	6.59097e-05	0.58166	269
	rs2850444	chr18	71085544	5.87515	-0.615505	5.68518	4.3605	3.1e-05	-1.74268	0.000718	-8.03171	-8.03171	-8.03171	0.639612	0.000162145	0.575265	1572
	rs72993680	chr2	154864058	5.66786	-0.425364	5.56817	4.25967	5e-05	1.3771	0.005914	-8.26668	-8.26668	-8.26668	0.481747	0.00045093	0.573675	224
	rs77499654	chr7	110517118	0.917921	6.2078	6.67746	-2.83859	8.9e-05	4.15249	0.0064	-8.74942	-8.74942	-8.74942	0.00487884	0.10075	0.571392	810
	rs35251323	chr7	143095256	15.4409	1.73437	17.5861	6.31987	5e-06	-2.86277	0.000511	-8.37839	-8.37839	-8.37839	0.155204	0.00156791	0.56793	831
	rs221834	chr7	100343175	9.3203	-1.62873	8.12876	5.14189	1.8e-05	-0.127167	0.001806	-7.96763	-7.96763	-7.96763	0.648725	0.000154613	0.564912	804
	rs33997725	chr8	111059359	5.3894	-0.753259	4.98834	4.13748	8.3e-05	-0.951117	0.007022	-7.89133	-7.89133	-7.89133	0.575948	0.000402339	0.564449	916
	rs78678965	chr14	102931738	5.14517	0.870412	6.23883	4.15733	4.1e-05	-2.2868	0.004436	-8.28349	-8.28349	-8.28349	0.30961	0.00125977	0.560624	1375
	rs4703660	chr5	71020861	2.87557	2.00511	5.12963	-3.43792	0.000108	-2.8272	0.002362	-8.15622	-8.15622	-8.15622	0.086717	0.00406188	0.545962	562
	rs74301671	chr8	10193764	5.51637	-1.09584	4.82038	4.25152	3.9e-05	0.241583	0.006384	-8.08333	-8.08333	-8.08333	0.573787	0.000325159	0.544181	854
	rs8004500	chr14	78558331	6.21537	-1.52415	5.12994	4.4452	2.9e-05	1.07995	0.000692	-8.34498	-8.34498	-8.34498	0.638901	0.00014426	0.54361	1358
	rs112400228	chr10	59570003	5.42241	0.477721	6.14408	4.17933	6.1e-05	-2.06101	0.004956	-8.40402	-8.40402	-8.40402	0.386299	0.000959022	0.543401	1047
	rs116897857	chr13	59052849	5.63351	-1.08129	4.58983	3.99461	0.00237	0.600631	0.004844	-7.63095	-7.63095	-7.63095	0.658947	0.000479654	0.542498	1287
	rs73942838	chr2	72026348	7.56014	-1.732	6.26022	-4.66641	6e-05	0.14563	0.001429	-8.69634	-8.69634	-8.69634	0.631479	5.50552e-05	0.53935	179
	rs1264706	chr6	30063652	-3.06436	71.751	67.9134	1.37441	1.4e-05	12.2748	0.001544	-8.82276	-8.82276	-8.82276	3.91832e-05	0.599354	0.532938	654
	rs7809394	chr7	55145382	4.14293	1.86416	6.38023	-4.10737	8e-06	2.83817	0.000955	-8.52655	-8.52655	-8.52655	0.118877	0.00252009	0.521203	781
	rs75468783	chr3	127554783	5.45885	-0.760504	4.94968	3.96273	0.000779	-0.717295	0.010962	-8.49331	-8.49331	-8.49331	0.527268	0.000285077	0.520569	355
	rs1410936	chr20	20411710	-0.900871	7.22066	6.63361	2.35221	2.8e-05	4.40713	0.000666	-8.52516	-8.52516	-8.52516	0.00147105	0.177886	0.509618	1630
	rs143386638	chr17	27025407	6.58051	-0.853343	6.0704	-4.35527	0.000158	0.021987	0.013948	-8.5035	-8.5035	-8.5035	0.525062	0.000170761	0.506824	1499

## Sheet: ST-9
	Supplementary Table 9: MG genome-wide significant genes showing evidence of association with AD
	Gene	Chr	Start	End	AD			MG			Stouffer's Method (equal weights / equal sample sizes)
					TopSNP	TopSNP Pvalue	P mBATcombo	TopSNP	TopSNP Pvalue	P mBATcombo	Z-score 1	Z-score 2	Stouffer's Z-score	P-value
	LY6G6D	6	31683125	31685696	rs11575849	0.00032	6.04e-06	rs9267549	1.36e-23	4.96e-21	-4.38	-9.34	-9.7	1.56e-22
	LY6G6F-LY6G6D	6	31674681	31685695	rs11575849	0.00032	6.11e-06	rs9267549	1.36e-23	1.52e-20	-4.37	-9.22	-9.61	3.62e-22
	DDAH2	6	31694815	31698394	rs11575849	0.00032	7.25e-06	rs9267549	1.36e-23	4.38e-21	-4.34	-9.35	-9.68	1.88e-22
	LY6G6C	6	31686425	31689523	rs11575849	0.00032	7.63e-06	rs9267549	1.36e-23	6.74e-21	-4.32	-9.3	-9.64	2.78e-22
	LY6G6F	6	31674643	31678456	rs11575849	0.00032	7.91e-06	rs9267549	1.36e-23	1.77e-20	-4.32	-9.2	-9.56	5.97e-22
	MPIG6B	6	31686371	31694491	rs11575849	0.00032	8.44e-06	rs9267549	1.36e-23	9.83e-21	-4.3	-9.26	-9.59	4.27e-22
	ENSG00000204422	6	31654739	31681849	rs11575849	0.00032	8.78e-06	rs9267549	1.36e-23	3.46e-23	-4.29	-9.85	-10	7.58e-24
	ABHD16A	6	31654732	31671133	rs11575849	0.00032	1.03e-05	rs9267549	1.36e-23	2.94e-23	-4.26	-9.87	-9.99	8.66e-24
	LY6G6E	6	31679548	31681842	rs11575849	0.00032	1.04e-05	rs9267549	1.36e-23	2.06e-21	-4.26	-9.43	-9.68	1.88e-22
	CLIC1	6	31698358	31707540	rs11575849	0.00032	2.79e-05	rs9267549	1.36e-23	9.43e-21	-4.03	-9.27	-9.4	2.63e-21
	BAG6	6	31606805	31620482	rs71563361	0.0007	0.000177	rs3130631	9.38e-28	9.06e-25	-3.57	-10.21	-9.74	9.77e-23
	APOM	6	31620193	31625987	rs71563361	0.0007	0.000199	rs3132449	1.59e-23	1.07e-22	-3.54	-9.73	-9.39	3.08e-21
	LY6G5C	6	31644461	31651817	rs11575849	0.00032	0.000214	rs9267549	1.36e-23	3.33e-23	-3.52	-9.85	-9.46	1.57e-21
	C6orf47	6	31626075	31628555	rs71563361	0.0007	0.000233	rs9267549	1.36e-23	1.96e-23	-3.5	-9.91	-9.48	1.28e-21
	TAP2	6	32789610	32806516	rs2856993	1.39e-05	0.000337	rs9276625	1.29e-15	2.89e-13	-3.4	-7.21	-7.5	3.21e-14
	GPANK1	6	31629005	31634060	rs11575849	0.00032	0.000362	rs9267549	1.36e-23	6.54e-23	-3.38	-9.78	-9.31	6.44e-21
	HLA-DOB	6	32780540	32788243	rs2856993	1.39e-05	0.00038	rs9276625	1.29e-15	4.95e-14	-3.37	-7.44	-7.64	1.06e-14
	ENSG00000250264	6	32781544	32806599	rs2856993	1.39e-05	0.000393	rs9276625	1.29e-15	4.86e-13	-3.36	-7.13	-7.42	5.9e-14
	PSMB9	6	32811913	32827628	rs2856993	1.39e-05	0.00044	rs9276772	2.25e-15	7.44e-11	-3.33	-6.41	-6.88	2.94e-12
	PSMB8	6	32808494	32812456	rs2856993	1.39e-05	0.000469	rs9276772	2.25e-15	2.24e-10	-3.31	-6.24	-6.75	7.43e-12
	TAP1	6	32812986	32821593	rs2856993	1.39e-05	0.000491	rs9276772	2.25e-15	1.07e-10	-3.3	-6.35	-6.82	4.52e-12
	NOTCH4	6	32162620	32191844	rs9267951	6.08e-06	0.000679	rs3132941	9.58e-20	1.16e-31	-3.2	-11.65	-10.5	4.21e-26
	CDSN	6	31082864	31088223	rs1265110	1.26e-05	0.000742	rs7750641	2e-28	7.71e-31	-3.18	-11.49	-10.37	1.71e-25
	TNXB	6	32008930	32083111	rs115521560	0.000893	0.000832	rs1150757	6.32e-21	1.18e-25	-3.14	-10.41	-9.58	4.81e-22
	POU5F1	6	31132114	31148508	rs1265110	1.26e-05	0.000847	rs3132510	4.72e-29	4.66e-27	-3.14	-10.71	-9.79	6.12e-23
	C6orf15	6	31079000	31080352	rs1265110	1.26e-05	0.000854	rs7750641	2e-28	1.96e-32	-3.14	-11.8	-10.56	2.25e-26
	MSH5-SAPCD1	6	31707797	31732628	rs11575849	0.00032	0.000878	rs625421	7.15e-24	1.13e-21	-3.13	-9.49	-8.92	2.24e-19
	MSH5	6	31707454	31730453	rs11575849	0.00032	0.00101	rs625421	7.15e-24	2.6e-21	-3.09	-9.4	-8.83	5.1e-19
	LY6G5B	6	31637944	31641553	rs11575849	0.00032	0.00104	rs9267549	1.36e-23	1.04e-22	-3.08	-9.74	-9.06	6.35e-20
	ENSG00000289282	6	31591651	31593276	rs71563361	0.0007	0.00117	rs3130631	9.38e-28	2.61e-26	-3.04	-10.55	-9.61	3.65e-22
	ENSG00000263020	6	31633879	31641323	rs11575849	0.00032	0.00119	rs9267549	1.36e-23	2.04e-22	-3.04	-9.67	-8.99	1.29e-19
	CSNK2B	6	31633004	31638120	rs11575849	0.00032	0.00127	rs9267549	1.36e-23	1.76e-22	-3.02	-9.68	-8.98	1.33e-19
	TCF19	6	31126324	31134936	rs1265110	1.26e-05	0.00155	rs3132510	4.72e-29	1.96e-29	-2.96	-11.2	-10.01	6.67e-24
	PRRC2A	6	31588492	31605548	rs71563361	0.0007	0.00162	rs3130631	9.38e-28	1.84e-25	-2.94	-10.36	-9.41	2.5e-21
	RNF5	6	32146182	32148570	rs17208153	1.13e-05	0.00162	rs3132941	9.58e-20	1.35e-29	-2.94	-11.24	-10.03	5.77e-24
	CCHCR1	6	31110216	31126015	rs1265110	1.26e-05	0.00163	rs3132510	4.72e-29	3.02e-29	-2.94	-11.17	-9.98	9.77e-24
	GPSM3	6	32158543	32163300	rs9267951	6.08e-06	0.00176	rs3132941	9.58e-20	2.47e-31	-2.92	-11.58	-10.25	5.64e-25
	FKBPL	6	32096484	32098065	rs17421624	0.002148	0.00189	rs1269852	9.56e-21	8.46e-26	-2.9	-10.44	-9.43	2.1e-21
	PSORS1C1	6	31082527	31107869	rs1265110	1.26e-05	0.00197	rs7750641	2e-28	1.1e-29	-2.88	-11.25	-10	7.85e-24
	ZSCAN9	6	28192664	28201265	rs1150707	0.000234	0.0021	rs13197633	9.86e-23	1.02e-16	-2.86	-8.22	-7.84	2.32e-15
	ZKSCAN4	6	28209475	28220047	rs1150707	0.000234	0.00234	rs13197633	9.86e-23	8.4e-16	-2.83	-7.96	-7.63	1.17e-14
	PSORS1C2	6	31105311	31106843	rs1265110	1.26e-05	0.00253	rs7750641	2e-28	2.17e-29	-2.8	-11.19	-9.9	2.13e-23
	NKAPL	6	28227075	28228736	rs1150707	0.000234	0.00263	rs35001169	1.02e-22	1.29e-15	-2.79	-7.91	-7.57	1.92e-14
	VWA7	6	31733367	31745105	rs11575849	0.00032	0.00288	rs625421	7.15e-24	2.31e-23	-2.76	-9.89	-8.95	1.85e-19
	AIF1	6	31582994	31584798	rs71563361	0.0007	0.00298	rs3130631	9.38e-28	2.84e-27	-2.75	-10.75	-9.55	6.58e-22
	VARS1	6	31745295	31763529	rs113525864	0.000631	0.00322	rs625421	7.15e-24	1.49e-24	-2.72	-10.16	-9.11	4.09e-20
	ZSCAN26	6	28234836	28246001	rs1150707	0.000234	0.00326	rs35001169	1.02e-22	7.26e-16	-2.72	-7.98	-7.57	1.91e-14
	SAPCD1	6	31730773	31732628	rs11575849	0.00032	0.00335	rs625421	7.15e-24	9.52e-23	-2.71	-9.75	-8.81	6.28e-19
	ENSG00000276302	6	28234899	28249357	rs1150707	0.000234	0.00352	rs35001169	1.02e-22	1.86e-15	-2.69	-7.86	-7.47	4.12e-14
	AGPAT1	6	32135989	32145873	rs17208153	1.13e-05	0.00359	rs3132941	9.58e-20	5.92e-28	-2.69	-10.9	-9.61	3.74e-22
	AGER	6	32148745	32152099	rs17208153	1.13e-05	0.0036	rs3132941	9.58e-20	1.96e-29	-2.69	-11.2	-9.82	4.5e-23
	H4C13	6	27840926	27841312	rs200972	0.000552	0.00418	rs66868086	7.96e-22	5.85e-16	-2.64	-8.01	-7.53	2.59e-14
	POLR1H	6	30026676	30032686	rs1150739	0.000226	0.00432	rs1264706	1.24e-34	3.75e-24	-2.63	-10.07	-8.98	1.38e-19
	MICA	6	31367561	31383092	rs3869129	0.000496	0.00449	rs3093958	2.61e-30	1.8e-31	-2.61	-11.61	-10.06	4.22e-24
	PGBD1	6	28249349	28270326	rs1150709	0.000274	0.00459	rs35744819	9.97e-23	8.67e-16	-2.61	-7.96	-7.47	4e-14
	C4B	6	31982572	32003195	rs115521560	0.000893	0.00491	rs386480	1.7e-21	4.79e-27	-2.58	-10.71	-9.4	2.84e-21
	ZKSCAN8P1	6	28129547	28137372	rs1225710	0.000302	0.00494	rs13197633	9.86e-23	2.97e-17	-2.58	-8.37	-7.74	4.96e-15
	H3C11	6	27839623	27840124	rs200972	0.000552	0.00593	rs66868086	7.96e-22	7.26e-16	-2.52	-7.98	-7.42	5.73e-14
	OR2B2	6	27878963	27880174	rs200972	0.000552	0.00645	rs66868086	7.96e-22	3.85e-12	-2.49	-6.84	-6.6	2.09e-11
	OR2B6	6	27925019	27925960	rs276369	0.000779	0.0071	rs13218875	1.78e-21	1.84e-14	-2.45	-7.57	-7.09	6.8e-13
	HLA-F	6	29690552	29706305	rs12663603	0.000977	0.00732	rs1610639	1.36e-16	1.2e-11	-2.44	-6.68	-6.45	5.61e-11
	H2AC16	6	27833095	27833576	rs200972	0.000552	0.00782	rs66868086	7.96e-22	3.86e-14	-2.42	-7.48	-6.99	1.33e-12
	CYP21A2	6	32006104	32009421	rs115521560	0.000893	0.00835	rs1150757	6.32e-21	2.76e-25	-2.39	-10.32	-8.99	1.21e-19
	H2AC17	6	27860477	27860963	rs200972	0.000552	0.00841	rs66868086	7.96e-22	3.55e-15	-2.39	-7.78	-7.19	3.16e-13
	PPT2	6	32121218	32131455	rs116753971	0.002233	0.00848	rs1269852	9.56e-21	1.29e-23	-2.39	-9.95	-8.72	1.36e-18
	H2BC17	6	27861203	27861669	rs200972	0.000552	0.0088	rs66868086	7.96e-22	4.83e-15	-2.37	-7.74	-7.15	4.21e-13
	C4A	6	31949829	31970458	rs115521560	0.000893	0.00886	rs537160	1.1e-21	8.64e-28	-2.37	-10.86	-9.36	4.05e-21
	HLA-E	6	30457286	30461971	rs2516648	0.000372	0.00895	rs3094694	4.11e-20	3.76e-07	-2.37	-4.95	-5.17	1.15e-07
	PBX2	6	32152510	32157979	rs17208153	1.13e-05	0.00914	rs3132941	9.58e-20	3.59e-30	-2.36	-11.35	-9.7	1.56e-22
	RPP21	6	30312908	30314661	rs3130136	0.001947	0.00919	rs3132634	8.39e-28	3.77e-22	-2.36	-9.61	-8.46	1.34e-17
	TRIM31	6	30070674	30080867	rs1150739	0.000226	0.00927	rs1264706	1.24e-34	8.39e-23	-2.35	-9.76	-8.57	5.35e-18
	VARS2	6	30881982	30894236	rs17196185	0.002119	0.00941	rs3095089	5.21e-33	1.93e-29	-2.35	-11.2	-9.58	4.67e-22
	ZKSCAN3	6	28317724	28336949	rs9301	0.000646	0.00948	rs13214023	7.36e-23	6.6e-17	-2.35	-8.27	-7.51	3e-14

## Sheet: ST-10
	Supplementary Table 10: Genes reaching genome-wide significance for AD and MG via Stouffer’s Combined P-Value
	Gene	Chr	Start	End	Alzheimer’s disease			Myasthenia gravis			Combined P-value: Stouffer's Method (equal weights / equal sample sizes)
					Top SNP	Top SNP P-value	mBATcombo	Top SNP	Top SNP P-value	P mBATcombo	Z-score 1	Z-score 2	Stouffer's Z-score	P-value
							P-value			P-value
	HLA-DRB5	6	32485130	32498064	rs5026743	1.25e-07	5.16e-06	rs9269173	1.26e-07	6.42e-05	-4.41	-3.83	-5.83	2.83e-09
	PRR14	16	30662038	30667734	rs9927137	4.44e-06	4.14e-05	rs150458589	1.52e-05	0.000242	-3.94	-3.49	-5.25	7.56e-08
	FBRS	16	30669752	30682131	rs9927137	4.44e-06	7.47e-06	rs150458589	1.52e-05	0.00024	-4.33	-3.49	-5.53	1.6e-08
	SRCAP	16	30709530	30752730	rs28853644	2.15e-05	4.3e-06	rs150458589	1.52e-05	0.000397	-4.45	-3.35	-5.52	1.71e-08
	TMEM265	16	30751963	30756517	rs28853644	2.15e-05	7.19e-06	rs35695082	2.43e-05	0.000731	-4.34	-3.18	-5.32	5.26e-08
	PHKG2	16	30759614	30772497	rs8058961	1.5e-05	3.22e-06	rs35695082	2.43e-05	0.000968	-4.51	-3.1	-5.38	3.68e-08
	RNF40	16	30773066	30787628	rs4889490	8.73e-06	1.04e-05	rs35695082	2.43e-05	0.00109	-4.26	-3.07	-5.18	1.12e-07
	ZNF629	16	30789777	30798526	rs4889490	8.73e-06	8.87e-06	rs35695082	2.43e-05	0.00127	-4.29	-3.02	-5.17	1.18e-07
	BCL7C	16	30844947	30905623	rs35675346	5.46e-07	8.42e-06	rs4889630	3.49e-06	0.000234	-4.3	-3.5	-5.52	1.73e-08
	CTF1	16	30907935	30914868	rs35675346	5.46e-07	2.79e-05	rs4889630	3.49e-06	0.000126	-4.03	-3.66	-5.44	2.7e-08
	FBXL19	16	30934376	30960104	rs35675346	5.46e-07	2.23e-05	rs17855121	4.86e-05	0.000236	-4.08	-3.5	-5.36	4.18e-08
	ORAI3	16	30960389	30967782	rs35675346	5.46e-07	3.38e-06	rs17855121	4.86e-05	0.000395	-4.5	-3.36	-5.56	1.38e-08
	SETD1A	16	30969075	30995985	rs35675346	5.46e-07	3.23e-05	rs17855121	4.86e-05	0.000478	-4	-3.3	-5.16	1.23e-07
	HSD3B7	16	30996528	31000468	rs7200879	1.55e-06	5.72e-06	rs17855121	4.86e-05	0.000244	-4.39	-3.49	-5.57	1.28e-08
	STX1B	16	31000577	31021959	rs12716979	3.18e-06	7.24e-06	rs17855121	4.86e-05	0.000433	-4.34	-3.33	-5.42	2.96e-08
	STX4	16	31044210	31054296	rs12716979	3.18e-06	5.53e-06	rs17855121	4.86e-05	0.000155	-4.4	-3.61	-5.66	7.62e-09

[truncated: 6 more sheets: ST-11, ST-12, ST-13, ST-14, ST-15, ST-16]
