# Supplementary material for: Genetic and mechanistic overlap between Alzheimer’s disease and myasthenia gravis: insights into neuro-immune crosstalk
Source: Research Square preprint supplement (doi:10.21203/rs.3.rs-8080408/v1), 2025-11-12
Supplement: Supplementary file 3 [file 88918ecebebf35aa8438ee5a.docx]

**Supplementary Note: Genetic and mechanistic overlap between Alzheimer’s disease and myasthenia gravis: insights into neuro-immune crosstalk**

Emmanuel O Adewuyi1,2’3*, Asa Aut43, Chinedu I. Ossai5, Chidozie C. Anyaegbu2,6, Thi Thu Huong Nguyen1, Md Rezanur Rahman7, Blossom C.M. Stephan8, Gizachew A Tessema1,2,9, Dale R Nyholt10, Gavin Pereira1,9,11

1 Curtin School of Population Health, Faculty of Health Sciences, Curtin University, Perth, Western Australia, Australia (emmanuel.adewuyi@curtin.edu.au; thithuhuong.nguyen1@curtin.edu.au, gizachew.tessema@curtin.edu.au; and gavin.f.pereira@curtin.edu.au)

2 Curtin Medical Research Institute, Faculty of Health Sciences, Curtin University, Perth, Western Australia, Australia (emmanuel.adewuyi@curtin.edu.au; chidozie.anyaegbu@curtin.edu.au, and gizachew.tessema@curtin.edu.au)

3 Centre for Global Health, Anchor University, Lagos, Nigeria (emmanuel.adewuyi@curtin.edu.au)

4 Faculty of Health, Social Care and Medicine, Edge Hill University, Ormskirk, L39 4QP UK (asa.auta@edgehill.ac.uk)

5 Independent Researcher – Melbourne, Victoria, Australia (ossaic@gmail.com)

6 Perron Institute for Neurological and Translational Science, L1 Ralph and Patricia Sarich Neuroscience Research Institute, Nedlands, WA, Australia (chidozie.anyaegbu@curtin.edu.au)

7 QIMR Berghofer, Herston, Brisbane, QLD (Rezanur.Rahman@qimrb.edu.au)

8 Dementia Centre of Excellence, Curtin enAble Institute, Faculty of Health Sciences, Curtin University, Perth, WA, Australia (blossom.stephan@curtin.edu.au)

9 enAble Institute, Curtin University, Perth, Western Australia, Australia (gizachew.tessema@curtin.edu.au; and gavin.f.pereira@curtin.edu.au)

10 Centre for Genomics and Personalised Health, School of Biomedical Sciences, Faculty of Health, Queensland University of Technology, Brisbane, QLD, Australia (d.nyholt@qut.edu.au)

11Faculty of Medicine, Universitas Negeri Malang, Indonesia (gavin.f.pereira@curtin.edu.au)

*Corresponding author: emmanuel.adewuyi@curtin.edu.au

# Local genetic correlation analysis between AD and MG (and MG subtypes)

# Table of contents

[Local genetic correlation analysis between AD and MG (and MG subtypes) 2](#_Toc213499028)

[Table of contents 2](#_Toc213499029)

[1.0 Overview 3](#_Toc213499030)

[2.0 Method (Brief: details in main manuscript) 3](#_Toc213499031)

[3.0 Results 3](#_Toc213499032)

[3.1 Multi-trait analysis for MG and subtypes 3](#_Toc213499033)

[3.2 Supplementary note Table 1: Local genetic correlation between MG and MG subtypes 4](#_Toc213499034)

[3.3 Pairwise LAVA Results: AD–MG and MG subtypes 5](#_Toc213499035)

[3.4 Supplementary note Table 2: Local genetic correlation between AD - MG and MG subtypes 5](#_Toc213499036)

[3.5 Pairwise LAVA Results: MG and MG Subtypes 7](#_Toc213499037)

[3.6 Supplementary note Table 3: Local genetic correlation between MG and MG subtypes 7](#_Toc213499038)

[4.0 Analysing our results 9](#_Toc213499039)

[4.1 Multi-trait local genetic correlations 9](#_Toc213499040)

[4.2 Pairwise local genetic correlations 10](#_Toc213499041)

[5.0 Comparison of multi-trait and pairwise models 10](#_Toc213499042)

[6.0 Stand-out loci and patterns in the local genetic correlation findings 11](#_Toc213499043)

[7.0 Biological and clinical implications 11](#_Toc213499044)

[8.0 References 12](#_Toc213499045)

# 1.0 Overview

This supplementary note presents additional results from our local genetic correlation analyses conducted using the LAVA (Local Analysis of [co]Variant Association) framework 1. These analyses build upon the genome-wide findings reported in the main manuscript, offering locus-specific insights into the shared genetic architecture between Alzheimer’s disease (AD)2 and myasthenia gravis (MG)3, including its subtypes: early-onset MG (EOMG) and late-onset MG (LOMG). LAVA examines regional patterns of genetic correlation, enabling the identification of specific genomic loci that may disproportionately contribute to the overall association between these traits 1. The findings presented here complement the summary provided in the main manuscript. We highlight the genomic regions showing significant or suggestive local correlations, particularly within the major histocompatibility complex (MHC) on chromosome 6 and additional loci across other chromosomes. These results provide further insights that could improve our understanding of the biological underpinnings potentially linking AD and MG and offer a foundation for future functional and mechanistic investigations.

# 2.0 Method (Brief: details in main manuscript)

To identify genomic regions contributing to the shared genetic architecture between AD and MG, we conducted local genetic correlation analyses using the LAVA framework 1, which refines genome-wide results by examining locus-specific correlations. More information about the specifics of the analyses is provided in the main manuscript. Briefly, analyses included MG subtypes (EOMG and LOMG) and used LAVA-defined linkage disequilibrium (LD) blocks based on the 1000 Genomes European reference panel (MAF > 0.5%). After harmonising effect alleles and applying quality control, LAVA estimated local heritability for each trait and proceeded to bivariate testing only for loci showing adequate univariate signals (P < 0.05). To control for potential sample overlap, genetic covariance intercepts from LDSC bivariate analyses were incorporated. We first performed a combined analysis that included AD, MG, EOMG, and LOMG. Then we ran separate pairwise analyses (AD–MG, AD–EOMG, AD–LOMG) to maximise SNP coverage, following the example of previous studies 4,5, as joint analyses include only SNPs shared across all traits.

# 3.0 Results

Details of the multi-trait LAVA analysis, which jointly modelled AD, MG, and its subtypes (EOMG and LOMG), have been reported in the main manuscript. The results summarised here focus on the pairwise local genetic correlation analyses of AD with MG (AD–MG, AD–LOMG, and AD–EOMG), the multi-trait LAVA analysis of MG with its subtypes, and the pairwise analysis between MG subtypes (EOMG and LOMG).

# 3.1 Multi-trait analysis for MG and subtypes

In the multi-trait model, MG–EOMG exhibited numerous highly significant local genetic correlations, representing the strongest signals within the MG spectrum. The most significant associations were in the extended MHC region on chromosome 6 (chr6:25.7–33.2 Mb), encompassing multiple contiguous loci (loci 950–962 and 966–968) with strong positive correlations (ρ = 0.58–0.96, p = 6.9 × 10-26–1.1 × 10-5). The peak correlation occurred at chr6:31.1–31.2 Mb (locus 958; ρ = 0.94, p = 6.9 × 10-26), reflecting intense genetic sharing across immune-regulatory variants within this region. In addition, a significant locus was identified at chr1:113.4–114.7 Mb (locus 100; ρ = 0.89, p = 9.3 × 10-7), representing the only non-MHC signal for MG-EOMG, except the suggestive association observed at chr17:45.9 – 47.5 Mb (locus 2209; ρ = 0.89, p = 2.42 × 10-2). The results confirm extensive and highly concordant local genetic correlations between MG and EOMG, predominantly driven by immune-related variation within the MHC.

## 3.2 Supplementary note Table 1: Local genetic correlation between MG and MG subtypes

| **Significant (p < 3.42 × 10-4, Bonferroni corrected for 146 analyses)** | | | | | | | | | | |
| --- | --- | --- | --- | --- | --- | --- | --- | --- | --- | --- |
| locus | chr | start | stop | n.snps | phen1 | phen2 | rho | rho.lower | rho.upper | p |
| 100 | 1 | 113418038 | 114664387 | 1494 | MG | EOMG | 0.89 | 0.70 | 1.00 | 9.31E-07 |
| 950 | 6 | 25684630 | 26396200 | 1714 | MG | EOMG | 0.79 | 0.62 | 0.96 | 1.60E-06 |
| 951 | 6 | 26396201 | 27261035 | 1325 | MG | EOMG | 0.83 | 0.69 | 0.95 | 3.75E-09 |
| 952 | 6 | 27261036 | 28666364 | 2632 | MG | EOMG | 0.80 | 0.68 | 0.91 | 5.64E-11 |
| 954 | 6 | 29529756 | 29833843 | 2342 | MG | EOMG | 0.96 | 0.89 | 1.00 | 1.46E-16 |
| 955 | 6 | 29833844 | 30070717 | 1279 | MG | EOMG | 0.90 | 0.80 | 0.98 | 1.39E-14 |
| 956 | 6 | 30070718 | 30715006 | 2277 | MG | EOMG | 0.79 | 0.68 | 0.88 | 4.32E-15 |
| 957 | 6 | 30715007 | 31106493 | 1860 | MG | EOMG | 0.81 | 0.72 | 0.89 | 1.82E-22 |
| 958 | 6 | 31106494 | 31250556 | 1303 | MG | EOMG | 0.94 | 0.88 | 0.99 | 6.97E-26 |
| 959 | 6 | 31250557 | 31320268 | 984 | MG | EOMG | 0.92 | 0.85 | 0.98 | 1.53E-21 |
| 960 | 6 | 31320269 | 31427209 | 1049 | MG | EOMG | 0.91 | 0.84 | 0.97 | 9.23E-22 |
| 961 | 6 | 31427210 | 32208901 | 1816 | MG | EOMG | 0.58 | 0.48 | 0.67 | 7.06E-17 |
| 962 | 6 | 32208902 | 32454577 | 1776 | MG | EOMG | 0.66 | 0.56 | 0.75 | 8.47E-17 |
| 966 | 6 | 32629240 | 32682213 | 490 | MG | EOMG | 0.42 | 0.26 | 0.56 | 1.06E-05 |
| 967 | 6 | 32682214 | 32897998 | 1267 | MG | EOMG | 0.61 | 0.47 | 0.72 | 1.11E-09 |
| 968 | 6 | 32897999 | 33194975 | 1880 | MG | EOMG | 0.70 | 0.53 | 0.84 | 2.51E-07 |
| 964 | 6 | 32539568 | 32586784 | 236 | MG | LOMG | 0.82 | 0.71 | 0.91 | 3.64E-08 |
| 100 | 1 | 113418038 | 114664387 | 1494 | MG | LOMG | 0.86 | 0.71 | 1.00 | 1.12E-06 |
| 965 | 6 | 32586785 | 32629239 | 206 | MG | LOMG | 0.51 | 0.35 | 0.64 | 4.24E-06 |
| 1957 | 14 | 22760701 | 23985936 | 1793 | MG | LOMG | 0.80 | 0.59 | 0.98 | 5.88E-05 |
| **Suggestively significant (3.42 × 10-4, < p < 0.05)** | | | | | | | | | | |
| 954 | 6 | 29529756 | 29833843 | 2342 | LOMG | EOMG | -0.50 | -1.00 | -0.03 | 4.20E-02 |
| 965 | 6 | 32586785 | 32629239 | 206 | MG | EOMG | 0.24 | 0.09 | 0.37 | 2.12E-03 |
| 2209 | 17 | 45883902 | 47516224 | 2737 | MG | EOMG | 0.89 | 0.36 | 1.00 | 2.42E-02 |
| 959 | 6 | 31250557 | 31320268 | 984 | MG | LOMG | -0.62 | -1.00 | -0.32 | 3.57E-04 |
| 958 | 6 | 31106494 | 31250556 | 1303 | MG | LOMG | -0.45 | -0.85 | -0.15 | 5.34E-03 |
| 955 | 6 | 29833844 | 30070717 | 1279 | MG | LOMG | -0.62 | -1.00 | -0.14 | 1.27E-02 |
| 960 | 6 | 31320269 | 31427209 | 1049 | MG | LOMG | -0.36 | -0.73 | -0.07 | 1.95E-02 |
| 1719 | 11 | 112755447 | 113889019 | 1826 | MG | LOMG | 0.84 | 0.57 | 1.00 | 1.19E-03 |
| 2096 | 15 | 96864279 | 98025684 | 1252 | MG | LOMG | 0.62 | 0.31 | 0.84 | 4.05E-03 |
| 2255 | 18 | 20009697 | 21622716 | 2235 | MG | LOMG | 0.66 | 0.36 | 0.87 | 2.76E-03 |

MG: Myasthenia gravis, EOMG: early onset myasthenia gravis, LOMG: Late onset myasthenia gravis, chr: chromosomes, n.snps: number of single nucleotide polymorphisms, phen: phenotype, rho (ρ) is the local genetic correlation between phen1 and phen2 at a locus (–1 to 1), with positive values indicating shared risk, negative values indicating opposite effects, and magnitude reflecting the strength of sharing, p: p-value.

We also detected multiple strong local genetic correlations for MG–LOMG, with the most significant signals located within the MHC region and at several non-MHC loci. The strongest correlation was observed at chr6:32.54–32.59 Mb (locus 964; ρ = 0.82, p = 3.6 × 10-8) within the classical MHC, followed by non-MHC signals at chr1:113.4–114.7 Mb (locus 100; ρ = 0.86, p = 1.1 × 10-6) and chr14:22.8–24.0 Mb (locus 1957; ρ = 0.80, p = 5.9 × 10-5). A nearby MHC signal at chr6:32.59–32.63 Mb (locus 965; ρ = 0.51, p = 4.2 × 10-6) also indicated a positive correlation. Additional suggestive loci were identified on chr11:112.8–113.9 Mb (locus 1719; ρ = 0.84, p = 1.2 × 10-3), chr15:96.9–98.0 Mb (locus 2096; ρ = 0.62, p = 4.1 × 10-3), and chr18:20.0–21.6 Mb (locus 2255; ρ = 0.66, p = 2.8 × 10-3), which are non-MHC. In contrast, a cluster of negative correlations was detected within the central MHC, specifically across chr6:29.8,31.4 Mb (loci 955, 958–960; ρ = –0.36 to –0.62, p < 0.05). The negative correlations suggest that genetic effects in the implicated region differ between the overall MG phenotype and its late-onset subset, potentially reflecting age-related immunogenetic divergence within the MG spectrum.

Finally, for LOMG–EOMG, only one locus showed a suggestive signal, marked by a negative local correlation within the MHC class I region (chr6:29.5–29.8 Mb; ρ = –0.50, p = 4.2 × 10-2). This result indicates an opposite allelic effect direction between early- and late-onset MG at this locus, consistent with partially distinct immunogenetic architectures underlying age-dependent disease onset. Notably, this locus (chr6:29.5–29.8 Mb; locus 954) corresponds to one of the strongest positive regions in the MG–EOMG comparison (ρ ≈ 0.96, p = 1.5 × 10-16). Its negative correlation in LOMG–EOMG therefore reinforces that EOMG-driven MHC class I effects are attenuated or reversed in LOMG, quantitatively capturing the immunogenetic divergence between early and late forms of MG.

## 3.3 Pairwise LAVA Results: AD–MG and MG subtypes

In the AD–MG pairwise analysis, two loci demonstrated significant (p < 1.43 × 10-3, accounting for 35 analyses) local genetic correlations. The strongest signal was detected at chr16:53.39–54.87 Mb (locus 2135; ρ = 0.54, p = 1.27 × 10-4), showing a robust positive correlation indicative of shared genetic influences between AD and MG within this region, potentially reflecting overlapping immune or metabolic pathways outside the MHC. A secondary, positive correlation emerged within the MHC region (chr6:32.59–32.63 Mb; locus 965; ρ = 0.19, p = 1.58 × 10-3). Additionally, two suggestive (p < 0.05) loci were observed: one within the extended MHC class I region (chr6:29.53–29.83 Mb; locus 954; ρ = 0.35, p = 2.83 × 10-2) showing a moderate positive correlation, and another on chromosome 18 (chr18:20.01–21.62 Mb; locus 2255; ρ = –0.23, p = 3.55 × 10-2) with a modest negative effect. The results suggest limited yet meaningful local genetic overlap between AD and MG, driven by immune-related regions both within and outside the MHC.

## 3.4 Supplementary note Table 2: Local genetic correlation between AD - MG and MG subtypes

| **locus** | **chr** | **start** | **stop** | **n.snps** | **phen1** | **phen2** | **rho** | **rho.lower** | **rho.upper** | **p** |
| --- | --- | --- | --- | --- | --- | --- | --- | --- | --- | --- |
| **AD - MG: Significant (P < 1.43E-03, adjusting for 35 analyses)** | | | | | | | | | | |
| 2135 | 16 | 53393883 | 54866095 | 3486 | AD | MG | 0.54 | 0.27 | 1.00 | 1.27E-04 |
| 965 | 6 | 32586785 | 32629239 | 360 | AD | MG | 0.19 | 0.07 | 0.31 | 1.58E-03 |
| **AG - MG: Suggestive (1.43E-03 > P > 0.05)** | | | | | | | | | | |
| 954 | 6 | 29529756 | 29833843 | 2411 | AD | MG | 0.35 | 0.04 | 0.67 | 2.83E-02 |
| 2255 | 18 | 20009697 | 21622716 | 2836 | AD | MG | -0.23 | -0.47 | -0.02 | 3.55E-02 |
| **AD - EOMG: Significant (P < 2.08E-03, adjusting for 24 analysis)** | | | | | | | | | | |
| 966 | 6 | 32629240 | 32682213 | 728 | AD | EOMG | -0.23 | -0.34 | -0.13 | 1.26E-05 |
| 969 | 6 | 33194976 | 33864262 | 1929 | AD | EOMG | 0.46 | 0.20 | 0.80 | 8.43E-04 |
| **AD - EOMG: Suggestive (2.08E-03 < P < 0.05)** | | | | | | | | | | |
| 965 | 6 | 32586785 | 32629239 | 397 | AD | EOMG | 0.10 | 0.03 | 0.17 | 3.72E-03 |
| 963 | 6 | 32454578 | 32539567 | 6 | AD | EOMG | -0.49 | -0.79 | -0.17 | 5.73E-03 |
| 950 | 6 | 25684630 | 26396200 | 1869 | AD | EOMG | 0.27 | 0.06 | 0.47 | 1.06E-02 |
| 956 | 6 | 30070718 | 30715006 | 2444 | AD | EOMG | 0.29 | 0.05 | 0.54 | 1.69E-02 |
| 1682 | 11 | 75445254 | 76518906 | 2284 | AD | EOMG | -0.34 | -0.81 | -0.02 | 3.56E-02 |
| **AD - LOMG: Significant (P < 2.08E-03, adjusting for 24 analysis)** | | | | | | | | | | |
| locus | chr | start | stop | n.snps | phen1 | phen2 | rho | rho.lower | rho.upper | p |
| 100 | 1 | 113418038 | 114664387 | 1514 | MG | LOMG | 0.90 | 0.75 | 1.00 | 8.24E-07 |
| 964 | 6 | 32539568 | 32586784 | 311 | MG | LOMG | 0.79 | 0.66 | 0.89 | 1.04E-06 |
| 965 | 6 | 32586785 | 32629239 | 285 | MG | LOMG | 0.50 | 0.34 | 0.63 | 5.01E-06 |
| 1957 | 14 | 22760701 | 23985936 | 1822 | MG | LOMG | 0.81 | 0.64 | 0.97 | 1.11E-05 |
| 959 | 6 | 31250557 | 31320268 | 1061 | MG | LOMG | -0.62 | -1.00 | -0.31 | 4.26E-04 |
| 1719 | 11 | 112755447 | 113889019 | 1873 | MG | LOMG | 0.89 | 0.65 | 1.00 | 6.39E-04 |
| **AD - LOMG: Suggestive (2.08E-03 < P < 0.05)** | | | | | | | | | | |
| 958 | 6 | 31106494 | 31250556 | 1322 | MG | LOMG | -0.46 | -0.87 | -0.15 | 4.36E-03 |
| 2096 | 15 | 96864279 | 98025684 | 1280 | MG | LOMG | 0.62 | 0.29 | 0.86 | 5.53E-03 |
| 2255 | 18 | 20009697 | 21622716 | 2267 | MG | LOMG | 0.63 | 0.28 | 0.85 | 5.58E-03 |
| 955 | 6 | 29833844 | 30070717 | 1365 | MG | LOMG | -0.60 | -1.00 | -0.12 | 1.71E-02 |
| 960 | 6 | 31320269 | 31427209 | 1116 | MG | LOMG | -0.33 | -0.71 | -0.04 | 2.64E-02 |

chromosomes, n.snps: number of single nucleotide polymorphisms, phen: phenotype, rho (ρ) is the local genetic correlation between phen1 and phen2 at a locus (–1 to 1), with positive values indicating shared risk, negative values indicating opposite effects, and magnitude reflecting the strength of sharing, p: p-value.

In the AD–LOMG pairwise analysis, multiple loci exhibited significant (p < 1.85 × 10-3, accounting for 27 analyses) or suggestive (p < 0.05) local genetic correlations, with mixed directions of effect. The strongest negative correlation occurred within the MHC class I region (chr6:29.8–30.1 Mb; locus 955; ρ = –0.49, p = 1.3 × 10-5), followed by another negative signal on chr15:96.8–98.0 Mb (locus 2096; ρ = –0.44, p = 4.8 × 10-4). A smaller but positive correlation was observed within the MHC class II region (chr6:32.59–32.63 Mb; locus 965; ρ = 0.18, p = 1.6 × 10-3), suggesting localised immunogenetic overlap. Several loci showed suggestive associations, including additional MHC-linked regions: chr6:32.54–32.59 Mb (locus 964; ρ = 0.23, p = 1.9 × 10-3), chr6:32.20–32.45 Mb (locus 962; ρ = 0.25, p = 1.3 × 10-2), and chr6:32.63–32.82 Mb (locus 966; ρ = 0.20, p = 2.8 × 10-2). Outside the MHC, negative or nominal correlations were identified at chr7:130.4–131.9 Mb (locus 1209; ρ = –0.32, p = 1.5 × 10-2), chr14:22.7–23.9 Mb (locus 1957; ρ = –0.20, p = 2.4 × 10-2), and chr18:20.0–21.6 Mb (locus 2255; ρ = –0.25, p = 4.7 × 10-2). The chr16:53.4–54.9 Mb locus (locus 2135; ρ = 0.29, p = 4.8 × 10-2) also showed a nominal positive correlation, consistent with its cross-trait relevance in the AD–MG analysis. These findings reveal a complex interplay of positive and negative local correlations between AD and LOMG, predominantly concentrated within the MHC region but extending to non-MHC loci on chromosomes 7, 14, 15, 16, and 18, potentially reflecting the distinct yet overlapping immunogenetic and neurodegenerative mechanisms contributing to disease susceptibility.

In the AD–EOMG pair, several loci within the MHC region (chr6:25–34 Mb) exhibited significant or suggestive local genetic correlations, although their directions were inconsistent, indicating a complex and heterogeneous immunogenetic relationship between AD and EOMG. The strongest signal appeared at chr6:32.63–32.68 Mb (locus 966; ρ = –0.23, p = 1.3 × 10⁻⁵), where the negative correlation implies divergent local genetic effects between AD and EOMG, consistent with differential immune regulation within this segment of the MHC class I region. In contrast, a nearby locus, chr6:33.19–33.86 Mb (locus 969; ρ = 0.46, p = 8.4 × 10⁻⁴), showed a strong positive correlation, suggesting that while some allelic variants in the MHC contribute oppositely to AD and EOMG susceptibility, others may act in a shared immunogenetic direction. Additional suggestive associations reinforce this mixed pattern. Upstream MHC loci at chr6:32.58 Mb (locus 965; ρ = 0.10, p = 3.7 × 10⁻³) and chr6:30.07 Mb (locus 956; ρ = 0.29, p = 1.7 × 10⁻²) showed positive but modest correlations, while chr6:32.45–32.54 Mb (locus 963; ρ = –0.49, p = 5.7 × 10⁻³) displayed a negative local correlation, again underscoring the fine-scale variability of immunogenetic architecture within the MHC. Outside the MHC, a weaker but notable signal was detected on chromosome 11 (chr11:75.4–76.5 Mb; locus 1682; ρ = –0.34, p = 3.6 × 10⁻²), suggesting that some non-MHC immune or neuroinflammatory pathways may contribute antagonistically to AD and EOMG risk. The findings indicate that the shared genetic landscape between AD and EOMG is dominated by MHC-driven heterogeneity, with both convergent (positive) and divergent (negative) local effects. This pattern may reflect the interplay between autoimmune and neurodegenerative immune processes, where certain HLA-linked variants confer vulnerability to autoimmunity while others mediate protective or opposing effects relevant to AD pathogenesis.

## 3.5 Pairwise LAVA Results: MG and MG Subtypes

For MG–LOMG, multiple loci showed strong positive local genetic correlations, particularly across the MHC region and select non-MHC loci. The most significant signals were observed at chr1:113.4–114.7 Mb (locus 100; ρ = 0.90, p = 8.2 × 10-7), chr6:32.54–32.59 Mb (locus 964; ρ = 0.79, p = 1.0 × 10-6), chr6:32.59–32.63 Mb (locus 965; ρ = 0.50, p = 5.0 × 10-6), and chr14:22.8–24.0 Mb (locus 1957; ρ = 0.82, p = 1.1 × 10-5). Additional positive correlations were detected at chr11:112.8–113.9 Mb (locus 1719; ρ = 0.90, p = 6.4 × 10-4). In contrast, a cluster of negative correlations was observed within the central MHC (e.g., locus 959: chr6:31.25–31.32 Mb; ρ = –0.62, p = 4.3 × 10-4), along with other suggestive loci including locus 958: chr6:31.11–31.25 Mb (ρ = –0.46, p = 4.4 × 10-3) and locus 955: chr6:29.83–30.07 Mb (ρ = –0.60, p = 1.7 × 10-2), reflecting age-related immunogenetic divergence between early- and late-onset MG. Additional suggestive positive correlations were found on chr15:96.9–98.0 Mb (locus 2096; ρ = 0.62, p = 5.5 × 10-3) and chr18:20.0–21.6 Mb (locus 2255; ρ = 0.63, p = 5.6 × 10-3), indicating potential additional loci contributing to shared susceptibility.

## 3.6 Supplementary note Table 3: Local genetic correlation between MG and MG subtypes

| **locus** | **chr** | **start** | **stop** | **n.snps** | **phen1** | **phen2** | **rho** | **rho.lower** | **rho.upper** | **p** |
| --- | --- | --- | --- | --- | --- | --- | --- | --- | --- | --- |
| **MG - EOMG: Significant (P < 2.17E-03, adjusting for 23 analyses)** | | | | | | | | | | |
| 959 | 6 | 31250557 | 31320268 | 1168 | MG | EOMG | 0.88 | 0.81 | 0.93 | 2.32E-29 |
| 958 | 6 | 31106494 | 31250556 | 1589 | MG | EOMG | 0.95 | 0.90 | 1.00 | 7.04E-29 |
| 957 | 6 | 30715007 | 31106493 | 2155 | MG | EOMG | 0.80 | 0.72 | 0.87 | 1.22E-25 |
| 961 | 6 | 31427210 | 32208901 | 2120 | MG | EOMG | 0.66 | 0.58 | 0.74 | 3.71E-24 |
| 960 | 6 | 31320269 | 31427209 | 1269 | MG | EOMG | 0.86 | 0.79 | 0.93 | 2.04E-20 |
| 962 | 6 | 32208902 | 32454577 | 1874 | MG | EOMG | 0.69 | 0.59 | 0.77 | 1.75E-18 |
| 954 | 6 | 29529756 | 29833843 | 2513 | MG | EOMG | 0.92 | 0.84 | 0.99 | 7.49E-18 |
| 956 | 6 | 30070718 | 30715006 | 2448 | MG | EOMG | 0.77 | 0.67 | 0.86 | 1.49E-16 |
| 955 | 6 | 29833844 | 30070717 | 1712 | MG | EOMG | 0.91 | 0.82 | 1.00 | 1.36E-14 |
| 966 | 6 | 32629240 | 32682213 | 593 | MG | EOMG | 0.56 | 0.45 | 0.66 | 3.20E-12 |
| 967 | 6 | 32682214 | 32897998 | 1593 | MG | EOMG | 0.59 | 0.47 | 0.69 | 5.05E-12 |
| 952 | 6 | 27261036 | 28666364 | 2729 | MG | EOMG | 0.78 | 0.66 | 0.89 | 3.23E-11 |
| 951 | 6 | 26396201 | 27261035 | 1387 | MG | EOMG | 0.82 | 0.69 | 0.94 | 1.91E-09 |
| 965 | 6 | 32586785 | 32629239 | 280 | MG | EOMG | 0.40 | 0.28 | 0.50 | 3.16E-08 |
| 950 | 6 | 25684630 | 26396200 | 1760 | MG | EOMG | 0.87 | 0.70 | 1.00 | 2.01E-07 |
| 968 | 6 | 32897999 | 33194975 | 1967 | MG | EOMG | 0.71 | 0.54 | 0.86 | 3.53E-07 |
| 100 | 1 | 113418038 | 114664387 | 2073 | MG | EOMG | 0.93 | 0.74 | 1.00 | 9.27E-07 |
| **MG - EOMG: Suggestive (2.17E-03 < P < 0.05)** | | | | | | | | | | |
| 2209 | 17 | 45883902 | 47516224 | 3277 | MG | EOMG | 0.89 | 0.44 | 1.00 | 1.35E-02 |
| **MG - LOMG: Significant (P < 2.08E-03, adjusting for 24 analyses)** | | | | | | | | | | |
| 100 | 1 | 113418038 | 114664387 | 1514 | MG | LOMG | 0.90 | 0.75 | 1.00 | 8.24E-07 |
| 964 | 6 | 32539568 | 32586784 | 311 | MG | LOMG | 0.79 | 0.66 | 0.89 | 1.04E-06 |
| 965 | 6 | 32586785 | 32629239 | 285 | MG | LOMG | 0.50 | 0.34 | 0.63 | 5.01E-06 |
| 1957 | 14 | 22760701 | 23985936 | 1822 | MG | LOMG | 0.81 | 0.64 | 0.97 | 1.11E-05 |
| 959 | 6 | 31250557 | 31320268 | 1061 | MG | LOMG | -0.62 | -1.00 | -0.31 | 4.26E-04 |
| 1719 | 11 | 112755447 | 113889019 | 1873 | MG | LOMG | 0.89 | 0.65 | 1.00 | 6.39E-04 |
| **MG - LOMG: Suggestive (2.08E-03 < P < 0.05)** | | | | | | | | | | |
| 958 | 6 | 31106494 | 31250556 | 1322 | MG | LOMG | -0.46 | -0.87 | -0.15 | 4.36E-03 |
| 2096 | 15 | 96864279 | 98025684 | 1280 | MG | LOMG | 0.62 | 0.29 | 0.86 | 5.53E-03 |
| 2255 | 18 | 20009697 | 21622716 | 2267 | MG | LOMG | 0.63 | 0.28 | 0.85 | 5.58E-03 |
| 955 | 6 | 29833844 | 30070717 | 1365 | MG | LOMG | -0.60 | -1.00 | -0.12 | 1.71E-02 |
| 960 | 6 | 31320269 | 31427209 | 1116 | MG | LOMG | -0.33 | -0.71 | -0.04 | 2.64E-02 |
| **LOMG - EOMG: Significant (P < 2.50E-03, adjusting for 20 analyses)** | | | | | | | | | | |
| 965 | 6 | 32586785 | 32629239 | 245 | LOMG | EOMG | -0.57 | -0.71 | -0.44 | 7.84E-13 |
| 966 | 6 | 32629240 | 32682213 | 536 | LOMG | EOMG | -0.72 | -0.86 | -0.57 | 1.29E-12 |
| 962 | 6 | 32208902 | 32454577 | 1866 | LOMG | EOMG | -0.64 | -0.78 | -0.49 | 2.59E-12 |
| 967 | 6 | 32682214 | 32897998 | 1341 | LOMG | EOMG | -0.68 | -0.88 | -0.49 | 2.38E-09 |
| 958 | 6 | 31106494 | 31250556 | 1354 | LOMG | EOMG | -0.74 | -0.97 | -0.54 | 1.44E-08 |
| 959 | 6 | 31250557 | 31320268 | 1102 | LOMG | EOMG | -0.73 | -0.96 | -0.51 | 7.10E-08 |
| 961 | 6 | 31427210 | 32208901 | 1894 | LOMG | EOMG | -0.51 | -0.71 | -0.34 | 7.79E-08 |
| 960 | 6 | 31320269 | 31427209 | 1111 | LOMG | EOMG | -0.62 | -0.84 | -0.42 | 3.41E-07 |
| 957 | 6 | 30715007 | 31106493 | 2028 | LOMG | EOMG | -0.59 | -0.84 | -0.38 | 7.15E-07 |
| 100 | 1 | 113418038 | 114664387 | 1541 | LOMG | EOMG | 1.00 | 0.59 | 1.00 | 2.41E-06 |
| 964 | 6 | 32539568 | 32586784 | 260 | LOMG | EOMG | -0.54 | -0.73 | -0.33 | 7.65E-06 |
| 956 | 6 | 30070718 | 30715006 | 2430 | LOMG | EOMG | -0.62 | -0.98 | -0.36 | 2.07E-05 |
| 955 | 6 | 29833844 | 30070717 | 1564 | LOMG | EOMG | -0.88 | -1.00 | -0.53 | 3.57E-05 |
| **LOMG - EOMG: Suggestive (2.50E-03 < P < 0.05)** | | | | | | | | | | |
| 954 | 6 | 29529756 | 29833843 | 2584 | LOMG | EOMG | -0.44 | -1.00 | -0.02 | 4.83E-02 |

MG: Myasthenia gravis, EOMG: early onset myasthenia gravis, LOMG: Late onset myasthenia gravis, chr: chromosomes, n.snps: number of single nucleotide polymorphisms, phen: phenotype, rho (ρ) is the local genetic correlation between phen1 and phen2 at a locus (–1 to 1), with positive values indicating shared risk, negative values indicating opposite effects, and magnitude reflecting the strength of sharing, p: p-value.

For MG–EOMG, numerous loci exhibited highly significant positive local genetic correlations, predominantly across the extended MHC region (chr6:25.7–33.2 Mb; ρ = 0.40–0.95, p = 3.2 × 10-12 –2.3 × 10-29). The strongest signals were observed at chr6:31.1–31.32 Mb (locus 958; ρ = 0.96, p = 7.0 × 10-29), chr6:31.25–31.32 Mb (locus 959; ρ = 0.88, p = 2.3 × 10-29), and chr6:29.53–29.83 Mb (locus 954; ρ = 0.92, p = 7.5 × 10-18), encompassing both MHC class I and class II regions, highlighting extensive genetic sharing driven by immune-regulatory loci. Additional significant positive correlations were detected at loci extending into adjacent MHC regions (e.g., loci 955–967; ρ = 0.56–0.91, p < 1 × 10-12), as well as chr1:113.4–114.7 Mb (locus 100; ρ = 0.929, p = 9.3 × 10-7), consistent with a broader contribution of immune-related genetic factors. Outside the MHC, a single suggestive signal was observed on chr17:45.9–47.5 Mb (locus 2209; ρ = 0.892, p = 1.35 × 10-2), indicating potential additional loci contributing modestly to shared susceptibility.

For LOMG–EOMG, multiple loci reached significance, revealing a broad pattern of negative local genetic correlations across the extended MHC region (chr6:29.5–33.0 Mb; ρ = –0.44 to –0.88, p = 3.6 × 10-5–7.8 × 10-8). The strongest signals were observed at chr6:31.1–32.8 Mb (ρ = –0.74 to –0.72, p = 1.4 × 10-8–7.1 × 10-8) and chr6:32.6–32.8 Mb (ρ = –0.72, p = 1.3 × 10-12), encompassing the MHC class II and class III regions. These correlations were uniformly negative, indicating that alleles conferring risk in EOMG tend to have opposite or attenuated effects in LOMG. Outside the MHC, a single positive correlation was detected at chr1:113.4–114.7 Mb (ρ = 1.00, p = 2.4 × 10-6), consistent with shared immune-regulatory involvement across MG subtypes. A suggestive negative signal was also found at chr6:29.5–29.8 Mb (ρ = –0.44, p = 4.8 × 10-2), overlapping the MHC class I region, further supporting a bimodal immunogenetic landscape in which early- and late-onset MG forms exhibit opposing allelic effects across key immune loci. These findings provide quantitative evidence of immunogenetic divergence within MG, with EOMG strongly driven by class I and II MHC effects that appear diminished or reversed in LOMG, reflecting age-related shifts in autoimmune susceptibility mechanisms.

# 4.0 Analysing our results

## 4.1 Multi-trait local genetic correlations

First, for MG and its subtypes, the multi-trait LAVA analysis revealed extensive local genetic correlations, dominated by signals within the extended MHC region. The MG–EOMG showed the most significant and pervasive positive correlations (ρ ≈ 0.6–0.95, p < 10⁻¹⁵) across contiguous loci from 25.7–33.2 Mb, confirming intense immunogenetic overlap. MG–LOMG similarly demonstrated strong correlations within the same region, although the strength and direction varied. Several non-MHC loci, notably on chromosomes 1 (113–115 Mb) and 14 (22–24 Mb), also exhibited positive local correlations, suggesting additional immune-regulatory components shared across the MG spectrum. Conversely, a subset of loci within the central MHC (=29–31 Mb) displayed negative correlations between MG and LOMG, which may indicate age-related divergence in HLA-driven effects. These results indicate that MG subtypes share a common immunogenetic foundation centred on the MHC, while differing in the allelic direction or magnitude of contribution across age groups.

Second, for the AD and MG (and MG subtypes), the multi-trait model revealed more restricted yet biologically meaningful overlap. Significant or suggestive local correlations were concentrated within the MHC, with additional signals across several non-MHC regions. The strongest shared locus for AD–MG is on chromosome 6 (32.59–32.63 Mb; ρ = 0.35, p = 9 × 10⁻⁵), bordered by adjacent MHC blocks with consistent positive correlations, indicating an extended interval of joint immunogenetic influence. AD–LOMG and AD–EOMG both showed clusters of suggestive signals in the same region, although the direction of correlation differed between subtypes: positive for LOMG, modest or negative for EOMG. This finding suggests subtype-specific immune effects within the broader AD–MG connection. Beyond the MHC, loci on chromosomes 3 (47.6–50.4 Mb), 16 (53.4–54.9 Mb), and 18 (20.0–21.6 Mb) exhibited nominal to suggestive correlations, collectively supporting a heterogeneous but significant shared genetic architecture.

## 4.2 Pairwise local genetic correlations

Pairwise LAVA analyses refined these relationships by maximising locus-specific SNP overlap. First, we assessed MG against its subtypes and the MG–EOMG category reproduced strong MHC-driven correlations similar to what we observed in the multi-trait model, confirming widespread positive sharing across class I and II regions. The MG–LOMG pair revealed both positive and negative signals within the MHC: positive in class II blocks (ρ ≈ 0.8–0.9) and negative in class I intervals (ρ ≈ –0.4 to –0.6), consistent with age-dependent divergence in immune architecture. The direct LOMG–EOMG contrast quantified this opposition: a series of uniformly negative correlations (ρ ≈ –0.5 to –0.8) across 29.5–33 Mb captured the inversion of allelic effects between early- and late-onset MG. These pairwise patterns provide clear evidence that while MG subtypes share a large portion of their heritable risk, they also exhibit discrete, directionally opposite signals across the MHC, representing distinct immunogenetic trajectories within a shared autoimmune framework.

Second, the pairwise testing between AD and MG (and its subtypes) identified additional detail and some loci not emphasised by the multi-trait model. For AD–MG, the most significant signal (ρ = 0.54, p = 1 × 10⁻⁴) occurred at chromosome 16 (53.4–54.9 Mb), corroborating a non-MHC locus potentially mediating shared immune-metabolic pathways. Within the MHC, a consistent positive correlation (ρ = 0.19, p = 1.6 × 10⁻³) was observed at 32.6 Mb. The AD–EOMG comparison displayed a heterogeneous pattern: a strong negative correlation at 32.6–32.7 Mb (ρ = –0.23) and a nearby positive one at 33.2–33.9 Mb (ρ = 0.46), underscoring fine-scale functional heterogeneity within HLA class I/II boundaries. AD–LOMG yielded the most complex mixture of directions, with both significant negative (29.8–30.1 Mb; ρ = –0.49) and positive (32.6 Mb; ρ = 0.18) MHC signals, alongside suggestive non-MHC loci on chromosomes 7, 14, 15, 16, and 18. The overall pattern indicates that AD shares selected immunogenetic components with MG, but these are regionally confined and sometimes act in opposite directions depending on MG subtype.

# 5.0 Comparison of multi-trait and pairwise models

Comparing results across analytical frameworks emphasises both methodological interdependence and biological complexity. The multi-trait model excels at detecting broadly shared loci influencing all included traits; hence, the pronounced MHC signals across MG subtypes and the consistent AD–MG correlations. The pairwise analyses, by contrast, increase resolution for subtype-specific effects and can capture opposite directional relationships masked in joint models. For MG, this difference was striking, as the loci appearing strongly positive in the multi-trait model proved to contain localised negative correlations when examined between subtypes, revealing true allelic heterogeneity. Similarly, for AD–MG relationships, pairwise testing exposed both convergent (positive) and divergent (negative) MHC blocks that the joint model’s averaging could not fully resolve. Thus, both approaches are complementary; the multi-trait model identifies the overarching architecture, whereas pairwise comparisons delineate the fine-scale immunogenetic landscape. This dual-analytic framework is therefore recommended for future studies exploring local genetic correlations, as it provides a balanced understanding of both global and locus-specific architecture

# 6.0 Stand-out loci and patterns in the local genetic correlation findings

In the MG and subtype analyses, the extended MHC region remains the principal hub of shared heritability across both multi-traits and pairwise models. Positive correlations spanning class II loci reaffirm common HLA-restricted antigen-presentation pathways, whereas negative correlations in class I regions suggest distinct or competing immunoregulatory mechanisms influencing age of onset. Outside the MHC, replicable signals on chromosomes 1 and 14 support additional immune-regulatory loci contributing to disease susceptibility. These findings quantify both the commonality and heterogeneity of MG genetics, providing a molecular basis for clinical variation between early- and late-onset forms.

For AD–MG relationships, two patterns stand out. First, recurrent correlations within the MHC, positive in AD–MG overall, but variable across subtypes, indicate that specific HLA alleles or haplotypes may contribute to both peripheral autoimmunity and central neuroinflammation. Second, the discovery of shared non-MHC loci on chromosomes 16, 14, 11, and 18 suggests that additional immune or metabolic mechanisms underlie genetic convergence between AD and MG. The coexistence of positive and negative correlations implies pleiotropic effects: some variants may promote susceptibility to both diseases through chronic immune activation, whereas others might protect against one while increasing risk for the other.

# 7.0 Biological and clinical implications

These results collectively support an immunogenetic continuum linking MG and AD, defined by overlapping but non-identical architecture. This position is consistent with previous evidence linking AD and immune-related traits 6,7. Within MG, the MHC represents a core driver of autoimmunity whose allelic effects differ by age and clinical phenotype, as indicated in our study. Extending this observation to AD, the same immunogenetic regions contribute to neurodegenerative risk, albeit through partially distinct functional variants and directions of effect. The alternating pattern of positive and negative correlations within the MHC suggests that AD and MG may share common immune regulatory networks that diverge at the level of effector pathways. Non-MHC loci showing shared correlation, particularly on chromosome 16, further hint at convergent immune-metabolic mechanisms bridging systemic and central inflammation.

Clinically, these findings suggest that the genetic overlap between peripheral autoimmunity and neurodegeneration is selective rather than global, confined to specific genomic regions and immune mechanisms. MG subtypes demonstrate internal coherence in their distinct yet consistent immunogenetic architectures, whereas the AD–MG intersections reflect targeted overlaps that may influence comorbidity or treatment response. For instance, individuals carrying certain HLA haplotypes or allelic configurations at shared loci could hypothetically exhibit altered susceptibility to neuroinflammatory or cognitive decline processes, while AD patients with autoimmune-linked variants may show distinct immune activation profiles. These hypotheses warrant validation through clinical and biomarker studies examining immune function and cognitive outcomes across both disease contexts.

# 8.0 References

1 Werme, J., van der Sluis, S., Posthuma, D. & de Leeuw, C. A. An integrated framework for local genetic correlation analysis. *Nature Genetics* **54**, 274-282 (2022). https://doi.org/10.1038/s41588-022-01017-y

2 Jansen, I. E. *et al.* Genome-wide meta-analysis identifies new loci and functional pathways influencing Alzheimer’s disease risk. *Nature genetics* **51**, 404-413 (2019).

3 Braun, A. *et al.* Genome-wide meta-analysis of myasthenia gravis uncovers new loci and provides insights into polygenic prediction. *Nature Communications* **15**, 9839 (2024). https://doi.org/10.1038/s41467-024-53595-6

4 Adewuyi, E. O. *et al.* Genome-wide cross-disease analyses highlight causality and shared biological pathways of type 2 diabetes with gastrointestinal disorders. *Communications Biology* **7**, 643 (2024). https://doi.org/10.1038/s42003-024-06333-z

5 Kirby, A., Porter, T., Adewuyi, E. O. & Laws, S. M. Investigating Genetic Overlap between Alzheimer’s Disease, Lipids, and Coronary Artery Disease: A Large-Scale Genome-Wide Cross Trait Analysis. *International Journal of Molecular Sciences* **25**, 8814 (2024).

6 Enduru, N. *et al.* Genetic overlap between Alzheimer’s disease and immune-mediated diseases: an atlas of shared genetic determinants and biological convergence. *Molecular Psychiatry* **29**, 2447-2458 (2024). https://doi.org/10.1038/s41380-024-02510-y

7 Yokoyama, J. S. *et al.* Association between genetic traits for immune-mediated diseases and Alzheimer disease. *JAMA neurology* **73**, 691-697 (2016).
